# Supplementary material for: Towards a selective synthetic route for cobalt amino acid complexes and their application in ring opening polymerization of rac-lactide
Source: Royal Society of Chemistry journal article supplement (doi:10.1039/d1ra02909f), 2021-01-01
Supplement: d1ra02909f1.pdf [file d1ra02909f1.pdf]

**Electronic Supplementary Information (ESI) for**

**Towards a selective synthetic route of cobalt amino acids complexes and their application in ring opening polymerization of *rac*-lactide**

*Andrés Castro Ruiz*<sup>1</sup>, *Krishna K. Damodaran*<sup>1</sup> and *Sigridur G. Suman*<sup>1</sup>

<sup>1</sup>Science Institute, University of Iceland, Dunhagi 3, 107 Reykjavik,  
Iceland.

**Contents**

Tables S1 – S3 Summary of crystallographic data collection

Tables S4 – S10: Selected bond lengths and angles for **1**, **2**, **1a**, **7**, **9a**, **4a** and **Co(bipy)<sub>2</sub>Cl<sub>2</sub>**.

Figure S1 – S3: Molecular structures of **9a**, **4a** and **Co(bipy)<sub>2</sub>Cl<sub>2</sub>**

Figure S4 – S17: NMR spectroscopy of compounds

Figures S18 –S25: Infrared spectra

Figures S26 – S30: HRMS of compounds

Figures S30 – S33: GPC traces of PLA polymers

Figures S34 – S39: NMR analysis of polymers

Table S1. Summary of crystal data and structural refinement parameters for **1**, **2** and **1a**.

| Parameter                                                          | <b>1</b>                                                                                       | <b>2</b>                                                                                      | <b>1a</b>                                                          |
|--------------------------------------------------------------------|------------------------------------------------------------------------------------------------|-----------------------------------------------------------------------------------------------|--------------------------------------------------------------------|
| Empirical formula                                                  | C <sub>28</sub> H <sub>56</sub> N <sub>8</sub> O <sub>20</sub> Co <sub>3</sub> Cl <sub>4</sub> | C <sub>46</sub> H <sub>67</sub> Cl <sub>2</sub> Co <sub>2</sub> N <sub>9</sub> O <sub>8</sub> | C <sub>14</sub> H <sub>18</sub> CoN <sub>4</sub> O <sub>5</sub> Cl |
| Colour                                                             | Orange block                                                                                   | Red plate                                                                                     | Red needle                                                         |
| Formula weight (g mol <sup>-1</sup> )                              | 1143.39                                                                                        | 1062.84                                                                                       | 416.70                                                             |
| Crystal size (mm)                                                  | 0.25 x 0.18 x 0.14                                                                             | 0.21 × 0.16 × 0.09                                                                            | 0.35 x 0.22 x 0.08                                                 |
| Crystal system                                                     | Triclinic                                                                                      | Monoclinic                                                                                    | Monoclinic                                                         |
| Space group                                                        | P-1                                                                                            | C2                                                                                            | <i>P</i> 2 <sub>1</sub> / <i>n</i>                                 |
| a (Å)                                                              | 8.2215(6)                                                                                      | 21.1914(10)                                                                                   | 7.8928 (7)                                                         |
| b (Å)                                                              | 10.3798(8)                                                                                     | 24.4687(11)                                                                                   | 19.9184 (17)                                                       |
| c (Å)                                                              | 14.8086(11)                                                                                    | 11.0348(5)                                                                                    | 10.8042 (9)                                                        |
| α (°)                                                              | 72.939                                                                                         |                                                                                               |                                                                    |
| β (°)                                                              | 75.786                                                                                         | 93.193(2)                                                                                     | 106.081                                                            |
| γ (°)                                                              | 89.555                                                                                         |                                                                                               |                                                                    |
| Volume (Å <sup>3</sup> )                                           | 1168.305                                                                                       | 5712.9(5)                                                                                     | 1632.1(2)                                                          |
| Z                                                                  | 1                                                                                              | 8                                                                                             | 4                                                                  |
| ρ <sub>calc.</sub> (g/cm <sup>3</sup> )                            | 1.6251                                                                                         | 1.236                                                                                         | 1.696                                                              |
| F(000)                                                             | 589                                                                                            | 2232                                                                                          | 856                                                                |
| μ K <sub>α</sub> (mm <sup>-1</sup> )                               | μ MoK <sub>α</sub> 1.361                                                                       | μ CuK <sub>α</sub> 5.843                                                                      | μ MoK <sub>α</sub> 1.250                                           |
| Temperature (K)                                                    | 150(2)                                                                                         | 150(2)                                                                                        | 150(2)                                                             |
| Reflections collected/unique/observed [ <i>I</i> > 2σ( <i>I</i> )] | 47209/6847/6482                                                                                | 44343/12007/9007                                                                              | 38925/4102/3308                                                    |
| Data/restraints/parameters                                         | 6847/0/332                                                                                     | 12007/1/616                                                                                   | 4102/0/234                                                         |
| Goodness of fit on F <sup>2</sup>                                  | 1.029                                                                                          | 1.005                                                                                         | 1.005                                                              |
| Final R indices [ <i>I</i> > 2σ( <i>I</i> )]                       | <i>R</i> <sub>1</sub> = 0.0205, w <i>R</i> <sub>2</sub> = 0.0565                               | <i>R</i> <sub>1</sub> = 0.0617, w <i>R</i> <sub>2</sub> = 0.1593                              | <i>R</i> <sub>1</sub> = 0.0386, w <i>R</i> <sub>2</sub> = 0.933    |
| R indices (all data)                                               | <i>R</i> <sub>1</sub> = 0.0220, w <i>R</i> <sub>2</sub> = 0.0575                               | <i>R</i> <sub>1</sub> = 0.0857, w <i>R</i> <sub>2</sub> = 0.1755                              | <i>R</i> <sub>1</sub> = 0.0557, w <i>R</i> <sub>2</sub> = 0.1017   |

Table S2. Summary of crystal data and structural refinement parameters for **7**, and **9a**.

| Parameter                             | <b>7</b>                                                         | <b>9a</b>                                                                                     |
|---------------------------------------|------------------------------------------------------------------|-----------------------------------------------------------------------------------------------|
| Empirical formula                     | C <sub>14</sub> H <sub>16</sub> N <sub>5</sub> O <sub>7</sub> Co | C <sub>44</sub> H <sub>58</sub> Cl <sub>2</sub> Co <sub>2</sub> N <sub>8</sub> O <sub>8</sub> |
| Colour, habit                         | Orange block                                                     | Red plate                                                                                     |
| Formula weight (g mol <sup>-1</sup> ) | 425.25                                                           | 1015.74                                                                                       |
| Crystal size (mm)                     | 0.25 × 0.23 × 0.18                                               | 0.30 × 0.20 × 0.18                                                                            |
| Crystal system                        | Orthorhombic                                                     | Triclinic                                                                                     |
| Space group                           | <i>P</i> 2 <sub>1</sub> 2 <sub>1</sub> 2 <sub>1</sub>            | P-1                                                                                           |

|                                                                |                                     |                                     |
|----------------------------------------------------------------|-------------------------------------|-------------------------------------|
| a (Å)                                                          | 10.4922(7)                          | 14.3084(13)                         |
| b (Å)                                                          | 10.5900(7)                          | 15.7813(15)                         |
| c (Å)                                                          | 15.1072(10)                         | 19.9421(18)                         |
| $\alpha$ (°)                                                   |                                     | 71.816(3)                           |
| $\beta$ (°)                                                    |                                     | 77.578(3)                           |
| $\gamma$ (°)                                                   |                                     | 64.570(3)                           |
| Volume (Å <sup>3</sup> )                                       | 1678.6(19)                          | 3846.3(6)                           |
| Z                                                              | 4                                   | 4                                   |
| $\rho_{\text{calc.}}$ (g/cm <sup>3</sup> )                     | 1.683                               | 0.882                               |
| F(000)                                                         | 872                                 | 1072                                |
| $\mu$ K $\alpha$ (mm <sup>-1</sup> )                           | $\mu$ MoK $\alpha$ 1.074            | $\mu$ MoK $\alpha$ 0.538            |
| Temperature (K)                                                | 295(2)                              | 130(2)                              |
| Reflections collected/unique/<br>observed [ $I > 2\sigma(I)$ ] | 59151/7083/6212                     | 131302/ 13517/ 11982                |
| Data/restraints/parameters                                     | 7083/0/245                          | 13517/0/623                         |
| Goodness of fit on F <sup>2</sup>                              | 1.039                               | 1.242                               |
| Final R indices [ $I > 2\sigma(I)$ ]                           | $R_1 = 0.0308$ , $wR_2 =$<br>0.0738 | $R_1 = 0.1066$ , $wR_2 =$<br>0.3296 |
| R indices (all data)                                           | $R_1 = 0.0400$ , $wR_2 =$<br>0.0776 | $R_1 = 0.1152$ , $wR_2 =$<br>0.3402 |

Table S3. Summary of crystal data and structural refinement parameters for **4a** and **Co(bipy)<sub>2</sub>Cl<sub>2</sub>** side product.

| Parameter                                  | <b>4a</b>                                                                        | <b>Co(bipy)<sub>2</sub>Cl<sub>2</sub></b>                        |
|--------------------------------------------|----------------------------------------------------------------------------------|------------------------------------------------------------------|
| Empirical formula                          | C <sub>14</sub> H <sub>16</sub> CoF <sub>6</sub> N <sub>4</sub> O <sub>4</sub> P | C <sub>20</sub> H <sub>16</sub> Cl <sub>2</sub> CoN <sub>4</sub> |
| Colour, habit                              | Red rod                                                                          | Red Needle                                                       |
| Formula weight<br>(gmol <sup>-1</sup> )    | 508.21                                                                           | 442.20                                                           |
| Crystal size (mm)                          | 0.28 x 0.15 x 0.09                                                               | 0.45 x 0.11 x 0.07                                               |
| Crystal system                             | Orthorhombic                                                                     | Monoclinic                                                       |
| Space group                                | <i>Pbca</i>                                                                      | <i>P2<sub>1</sub>/c</i>                                          |
| a (Å)                                      | 21.0340 (16)                                                                     | 8.3937(9)                                                        |
| b (Å)                                      | 8.2876 (6)                                                                       | 14.4906(16)                                                      |
| c (Å)                                      | 25.1217 (19)                                                                     | 15.5726(18)                                                      |
| $\alpha$ (°)                               |                                                                                  |                                                                  |
| $\beta$ (°)                                |                                                                                  | 97.479(4)                                                        |
| $\gamma$ (°)                               |                                                                                  |                                                                  |
| Volume (Å <sup>3</sup> )                   | 4379.2(6)                                                                        | 1878.0(4)                                                        |
| Z                                          | 8                                                                                | 4                                                                |
| $\rho_{\text{calc.}}$ (g/cm <sup>3</sup> ) | 1.542                                                                            | 1.564                                                            |
| F(000)                                     | 2048                                                                             | 900                                                              |
| $\mu$ K $\alpha$ (mm <sup>-1</sup> )       | $\mu$ MoK $\alpha$ 0.933                                                         | $\mu$ MoK $\alpha$ 1.211                                         |

|                                                                   |                                  |                                  |
|-------------------------------------------------------------------|----------------------------------|----------------------------------|
| Temperature (K)                                                   | 172(2)                           | 293(2)                           |
| Reflections<br>collected/unique/<br>observed [ $I > 2\sigma(I)$ ] | 209480/4862/4010                 | 37377 /3982 /3144                |
| Data/restraints/parameters                                        | 4862/0/271                       | 3982 /0/244                      |
| Goodness of fit on $F^2$                                          | 1.039                            | 1.017                            |
| Final R indices<br>[ $I > 2\sigma(I)$ ]                           | $R_1 = 0.0319$ , $wR_2 = 0.0935$ | $R_1 = 0.0300$ , $wR_2 = 0.0747$ |
| R indices (all data)                                              | $R_1 = 0.0411$ , $wR_2 = 0.0976$ | $R_1 = 0.0525$ , $wR_2 = 0.0790$ |

Table S4. Selected bond angles ( $^\circ$ ) and bond lengths ( $\text{\AA}$ ) for **1**.

| Angles          | Deg ( $^\circ$ ) | Bonds      | Distance, $\text{\AA}$ |
|-----------------|------------------|------------|------------------------|
| N(3)-Co(1)-N(4) | 83.28(4)         | Co(1)-N(1) | 1.9349(8)              |
| N(2)-Co(1)-O(3) | 86.18(3)         | Co(1)-N(2) | 1.9418(8)              |
| N(1)-Co(1)-O(1) | 85.56(3)         | Co(1)-N(3) | 1.9207(8)              |
| O(1)-Co(1)-O(3) | 90.04(3)         | Co(1)-N(4) | 1.9147(8)              |
| O(1)-Co(1)-N(4) | 175.04(3)        | Co(1)-O(1) | 1.9061(7)              |
| N(1)-Co(1)-N(2) | 172.80(3)        | Co(1)-O(3) | 1.8878(7)              |
| N(3)-Co(1)-O(3) | 175.77(3)        | C(6)-O(1)  | 1.2774(11)             |
| O(6)-Co(2)-O(5) | 92.18(3)         | C(6)-O(2)  | 1.2475(11)             |
| O(2)-Co(2)-O(5) | 83.60(3)         | C(8)-O(3)  | 1.2886(11)             |
| O(2)-Co(2)-O(6) | 88.27(3)         | C(8)-O(4)  | 1.2363(12)             |
| O(3)-C(8)-O(4)  | 122.94(9)        | Co(2)-O(2) | 2.1382(7)              |
| O(1)-C(6)-O(2)  | 124.06(9)        | Co(2)-O(5) | 2.0850(7)              |
|                 |                  | Co(2)-O(6) | 2.0580(8)              |

Table S5. Selected bond angles (°) and bond lengths (Å) for **2**.

| Angles          | Deg (°)   | Bonds      | Distance, Å |
|-----------------|-----------|------------|-------------|
| O(3)-C(7)-O(4)  | 123.0(7)  | Co(1)-O(1) | 1.913(6)    |
| O(1)-C(1)-O(2)  | 123.2(8)  | Co(1)-O(3) | 1.890(5)    |
| N(1)-Co(1)-N(2) | 171.1(3)  | Co(1)-N(1) | 1.955(7)    |
| N(1)-Co(1)-N(3) | 90.5(3)   | Co(1)-N(2) | 1.973(8)    |
| N(2)-Co(1)-N(4) | 91.5(3)   |            |             |
| N(2)-Co(1)-N(4) | 91.34(18) | Co(1)-N(3) | 1.932(7)    |
| N(2)-Co(1)-O(3) | 86.0(3)   | Co(1)-N(4) | 1.927(7)    |
| N(3)-Co(1)-O(1) | 173.1(3)  | C(1)-O(1)  | 1.269(11)   |
| N(4)-Co(1)-O(1) | 92.2(3)   | C(1)-O(2)  | 1.237(10)   |
|                 |           | C(7)-O(3)  | 1.313(9)    |
| O(3)-Co(1)-O(1) | 91.5(3)   | C(7)-O(4)  | 1.217(9)    |

Table S6. Selected bond angles (°) and bond lengths (Å) for **1a**.

| Angles          | Deg (°)   | Bonds      | Distance, Å |
|-----------------|-----------|------------|-------------|
| O(3)-C(3)-O(4)  | 124.4(2)  | Co(1)-O(1) | 1.9071(17)  |
| O(1)-C(1)-O(2)  | 123.3(2)  | Co(1)-O(3) | 1.8954(17)  |
| N(1)-Co(1)-N(2) | 172.42(8) | Co(1)-N(1) | 1.9572(2)   |
| N(1)-Co(1)-N(4) | 92.76(8)  | Co(1)-N(2) | 1.9495(2)   |
| N(2)-Co(1)-O(3) | 84.94(8)  | Co(1)-N(3) | 1.929(2)    |
| N(3)-Co(1)-O(1) | 176.15(8) | Co(1)-N(4) | 1.931(2)    |
| N(4)-Co(1)-O(3) | 176.56(8) | C(1)-O(1)  | 1.299(3)    |
| N(4)-Co(1)-O(1) | 93.35(8)  | C(1)-O(2)  | 1.231(3)    |
| N(1)-Co(1)-O(1) | 85.58(8)  | C(3)-O(3)  | 1.300(3)    |
| N(3)-Co(1)-O(3) | 93.73(8)  | C(3)-O(4)  | 1.224(3)    |
| N(4)-Co(1)-N(3) | 82.98(8)  |            |             |
| O(3)-Co(1)-O(1) | 89.96(7)  |            |             |

Table S7. Selected bond angles ( $^{\circ}$ ) and bond lengths ( $\text{\AA}$ ) for **7**.

| Angles          | Deg ( $^{\circ}$ ) | Bonds      | Distance, $\text{\AA}$ |
|-----------------|--------------------|------------|------------------------|
| O(3)-C(3)-O(4)  | 116.09(19)         | Co(1)-O(1) | 1.8930(13)             |
| O(1)-C(2)-O(2)  | 123.25(19)         | Co(1)-O(3) | 1.8886(15)             |
| N(3)-Co(1)-N(4) | 83.43(10)          | Co(1)-N(1) | 1.9465(15)             |
| N(2)-Co(1)-O(3) | 86.40(8)           | Co(1)-N(2) | 1.9391(16)             |
| N(1)-Co(1)-O(1) | 84.77(6)           | Co(1)-N(3) | 1.9271(17)             |
| N(3)-Co(1)-O(1) | 176.65(8)          | Co(1)-N(4) | 1.9066(18)             |
| N(4)-Co(1)-O(1) | 94.60(7)           | C(2)-O(1)  | 1.293(2)               |
| N(2)-Co(1)-N(1) | 171.84(7)          | C(2)-O(2)  | 1.225(2)               |
| O(3)-Co(1)-O(1) | 89.89(7)           | C(3)-O(3)  | 1.298(3)               |
|                 |                    | C(3)-O(4)  | 1.220(3)               |

Table S8. Selected bond angles ( $^{\circ}$ ) and bond lengths ( $\text{\AA}$ ) for **9a**.

| Angles          | Deg ( $^{\circ}$ ) | Bonds      | Distance, $\text{\AA}$ |
|-----------------|--------------------|------------|------------------------|
| O(1)-C(1)-O(2)  | 123.5(5)           | Co(1)-O(1) | 1.878(3)               |
| O(3)-C(7)-O(4)  | 122.8(5)           | Co(1)-O(3) | 1.881(3)               |
| N(1)-Co(1)-N(2) | 173.27(18)         | Co(1)-N(1) | 1.937(4)               |
| N(3)-Co(1)-N(4) | 83.31(18)          | Co(1)-N(2) | 1.945(4)               |
| N(1)-Co(1)-O(3) | 86.55(15)          | Co(1)-N(3) | 1.921(4)               |
| N(4)-Co(1)-O(1) | 93.88(17)          | Co(1)-N(4) | 1.919(4)               |
| N(4)-Co(1)-O(3) | 175.87(16)         | C(1)-O(1)  | 1.289(6)               |
| N(3)-Co(1)-O(1) | 175.85(16)         | C(1)-O(2)  | 1.213(6)               |
| N(1)-Co(1)-O(3) | 88.77(15)          | C(7)-O(3)  | 1.272(6)               |
| O(3)-Co(1)-O(1) | 89.48(15)          | C(7)-O(4)  | 1.240(6)               |
| O(5)-C(23)-O(7) | 123.5(5)           | Co(2)-O(5) | 1.868(5)               |
| O(7)-C(29)-O(8) | 122.8(5)           | Co(2)-O(7) | 1.879(4)               |
| N(5)-Co(2)-N(6) | 173.5(3)           | Co(2)-N(5) | 1.946(6)               |
| N(7)-Co(2)-N(8) | 83.5(3)            | Co(2)-N(6) | 1.931(5)               |
| N(8)-Co(2)-O(5) | 93.4(3)            | Co(2)-N(7) | 1.927(7)               |
| N(8)-Co(2)-O(7) | 175.3(3)           | Co(2)-N(8) | 1.928(6)               |
| N(7)-Co(2)-O(5) | 175.9(2)           | C(29)-O(7) | 1.282(7)               |
| N(6)-Co(2)-O(7) | 86.6(2)            | C(29)-O(8) | 1.243(7)               |
| N(5)-Co(2)-O(5) | 86.8(2)            | C(23)-O(5) | 1.295(9)               |
| O(7)-Co(2)-O(6) | 90.40(15)          | C(23)-O(6) | 1.230(11)              |
| N(7)-Co(1)-O(7) | 93.20(18)          |            |                        |

Table S9. Selected bond angles ( $^{\circ}$ ) and bond lengths ( $\text{\AA}$ ) for **4a**.

| Angles          | Deg ( $^{\circ}$ ) | Bonds      | Distance, $\text{\AA}$ |
|-----------------|--------------------|------------|------------------------|
| O(3)-C(3)-O(4)  | 123.75(18)         | Co(1)-O(1) | 1.8825(14)             |
| O(1)-C(1)-O(2)  | 123.28(2)          | Co(1)-O(3) | 1.8887(14)             |
| N(1)-Co(1)-N(2) | 172.25(7)          | Co(1)-N(1) | 1.9485(17)             |
| N(1)-Co(1)-N(4) | 92.35(7)           | Co(1)-N(2) | 1.9339(17)             |
| N(2)-Co(1)-O(3) | 86.15(7)           | Co(1)-N(3) | 1.9194(17)             |
| N(4)-Co(1)-O(1) | 175.36(7)          | Co(1)-N(4) | 1.9218(17)             |
| N(1)-Co(1)-O(1) | 85.90(7)           | C(1)-O(1)  | 1.290(3)               |
| N(3)-Co(1)-O(3) | 175.14(7)          | C(1)-O(2)  | 1.229(3)               |
| N(4)-Co(1)-N(3) | 83.19(7)           | C(3)-O(3)  | 1.291(2)               |
| O(3)-Co(1)-O(1) | 91.57(6)           | C(3)-O(4)  | 1.228(2)               |

Table S10. Selected bond angles ( $^{\circ}$ ) and bond lengths ( $\text{\AA}$ ) for **Co(bipy)<sub>2</sub>Cl<sub>2</sub>**

| Angles            | Deg ( $^{\circ}$ ) | Bonds       | Distance, $\text{\AA}$ |
|-------------------|--------------------|-------------|------------------------|
| N(1)-Co(1)-N(4)   | 161.61(6)          | Co(1)-Cl(1) | 2.4205(7)              |
| N(2)-Co(1)-Cl(2)  | 170.89(5)          | Co(1)-Cl(2) | 2.3968(7)              |
| N(3)-Co(1)-Cl(1)  | 172.34(4)          | Co(1)-N(1)  | 2.1461(16)             |
| Cl(1)-Co(1)-Cl(2) | 96.60(2)           | Co(1)-N(2)  | 2.1982(16)             |
| N(1)-Co(1)-N(3)   | 92.31(6)           | Co(1)-N(3)  | 2.1841(16)             |
| N(2)-Co(1)-N(4)   | 92.23(6)           | Co(1)-N(4)  | 2.1390(15)             |
| N(1)-Co(1)-N(2)   | 74.64(6)           |             |                        |
| N(3)-Co(1)-N(4)   | 74.75(6)           |             |                        |

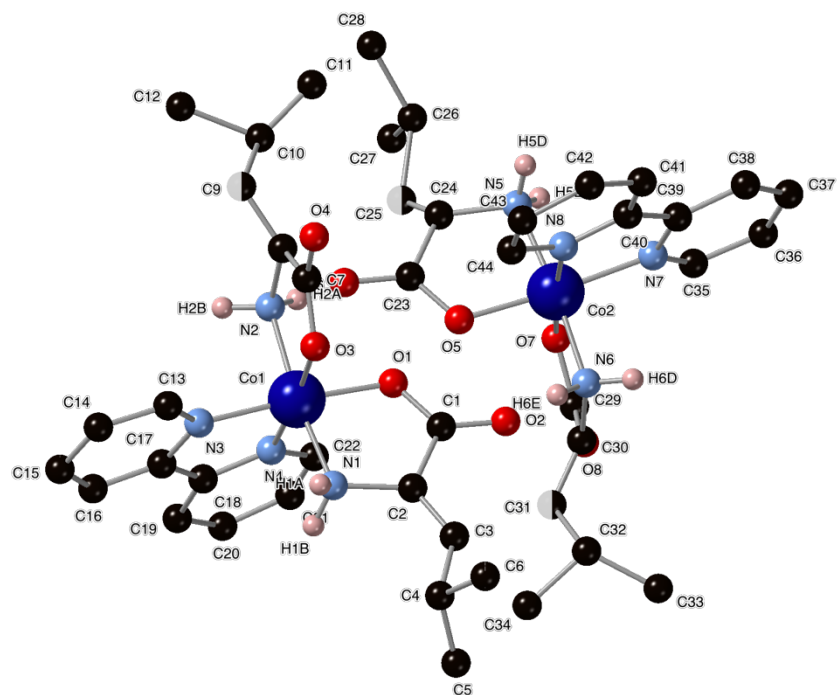

Figure S1. Ellipsoidal plot at 50% probability of the cation of **9a** showing both molecules with the asymmetric unit. Counter anion is  $\text{Cl}^-$  (not shown). Hydrogen atoms bound to amine N atom shown only.



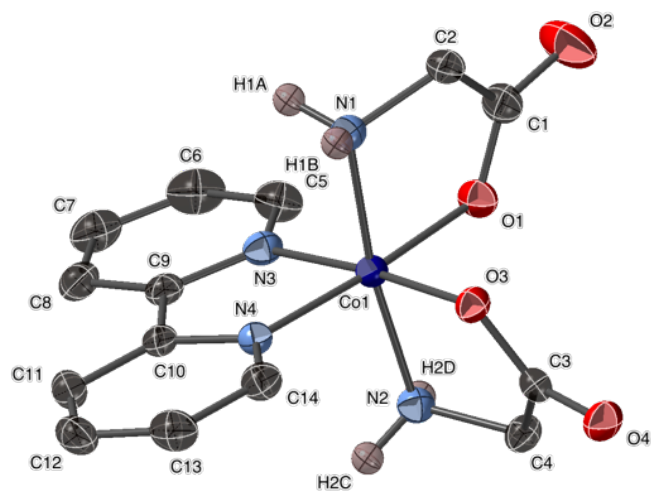

Figure S2. Ellipsoidal plot at 50% probability of the cation of **4a**. The counter anion is  $\text{PF}_6^-$  (not shown).

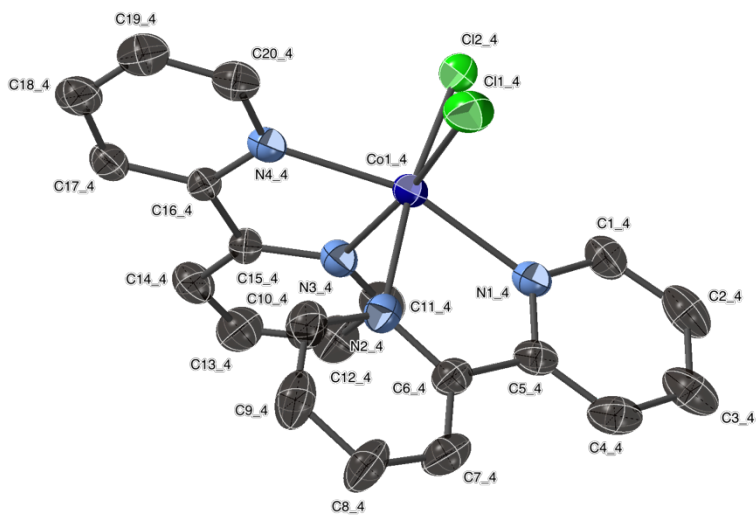

Figure S3. Ellipsoidal plot at 50% probability of  $\text{Co-bis(bipy)Cl}_2$ .

## NMR Spectroscopy.

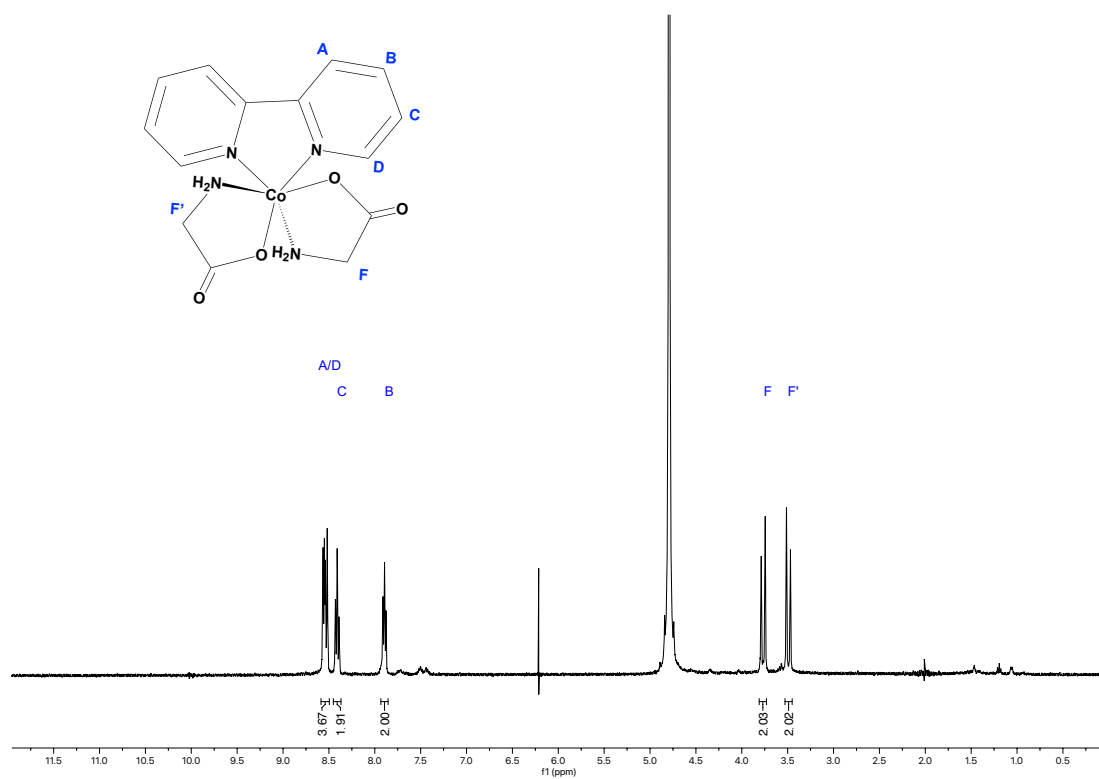

Figure S4.  $^1\text{H}$  NMR of **1a** in ( $\text{D}_2\text{O}$ , 298 K)

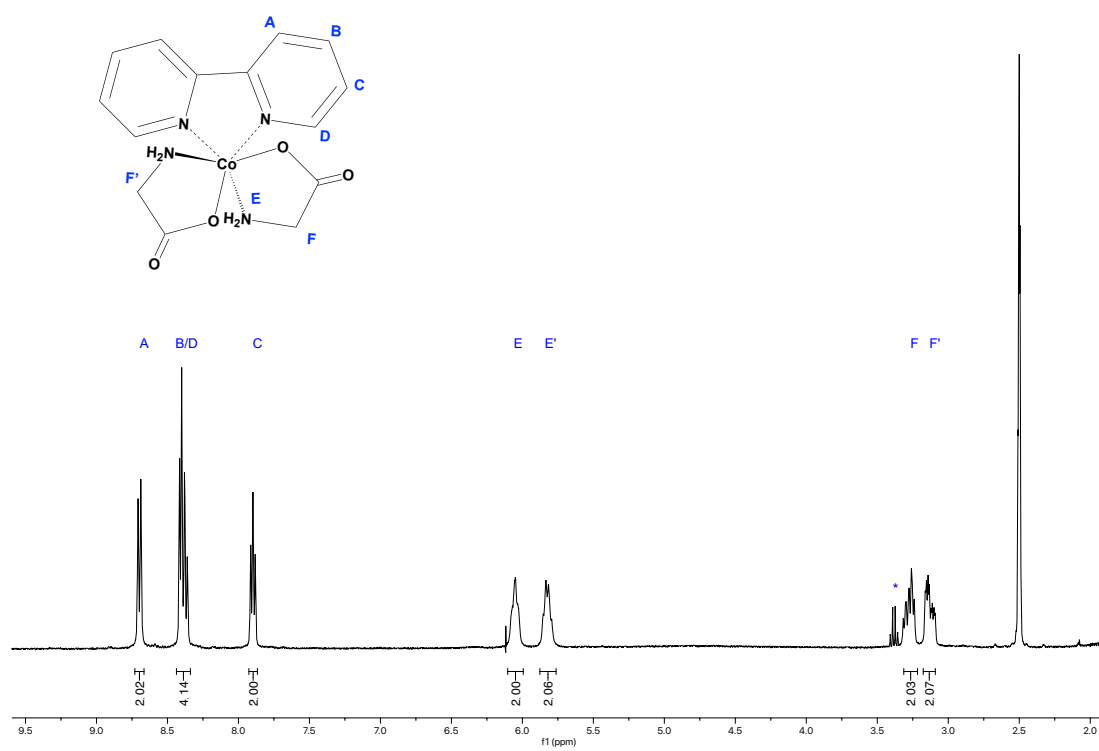

Figure S5.  $^1\text{H}$  NMR of **1a** in ( $\text{DMSO-}d_6$ , 298 K)(\*EtOH)

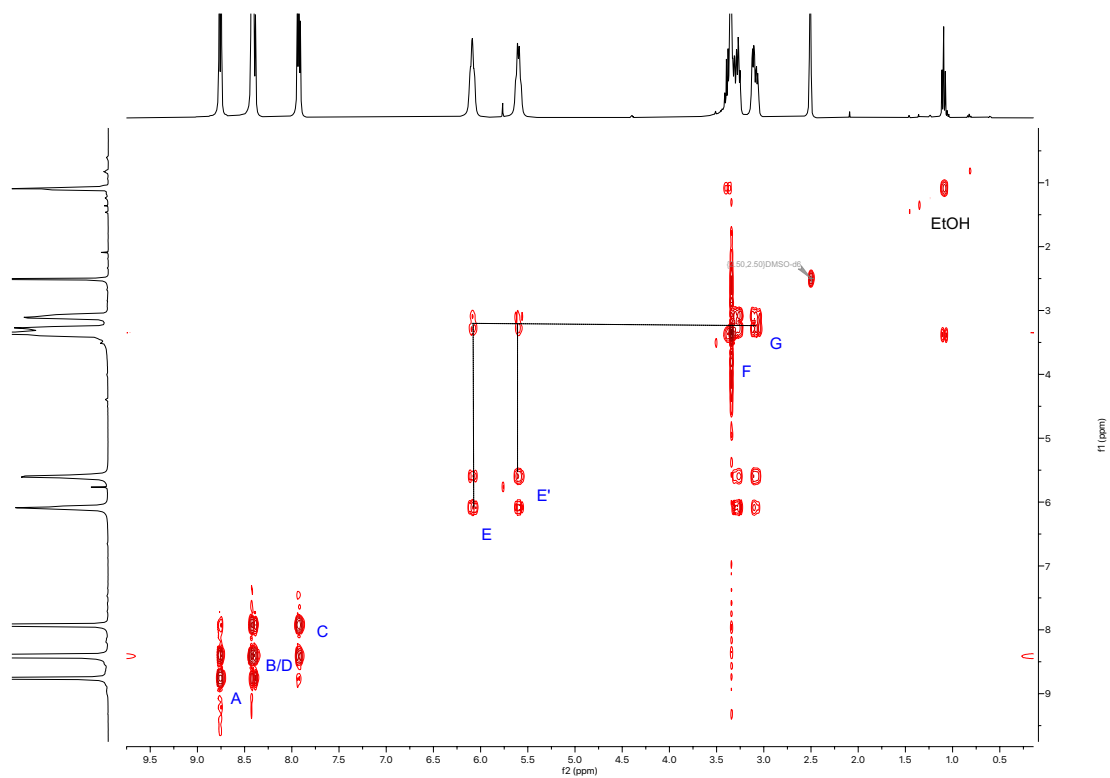

Figure S6. 2D COSY NMR of **1a** (DMSO- $d_6$ , 298 K)

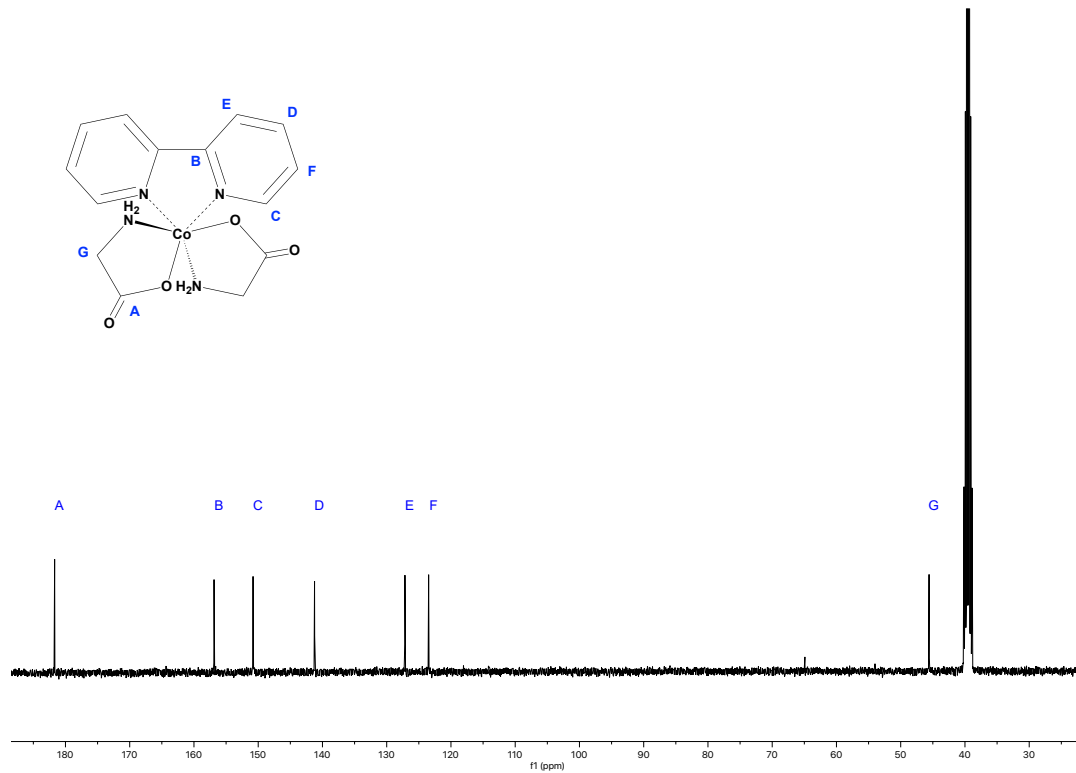

Figure S7.  $^{13}\text{C}$  NMR of **1a** (DMSO- $d_6$ , 298 K)

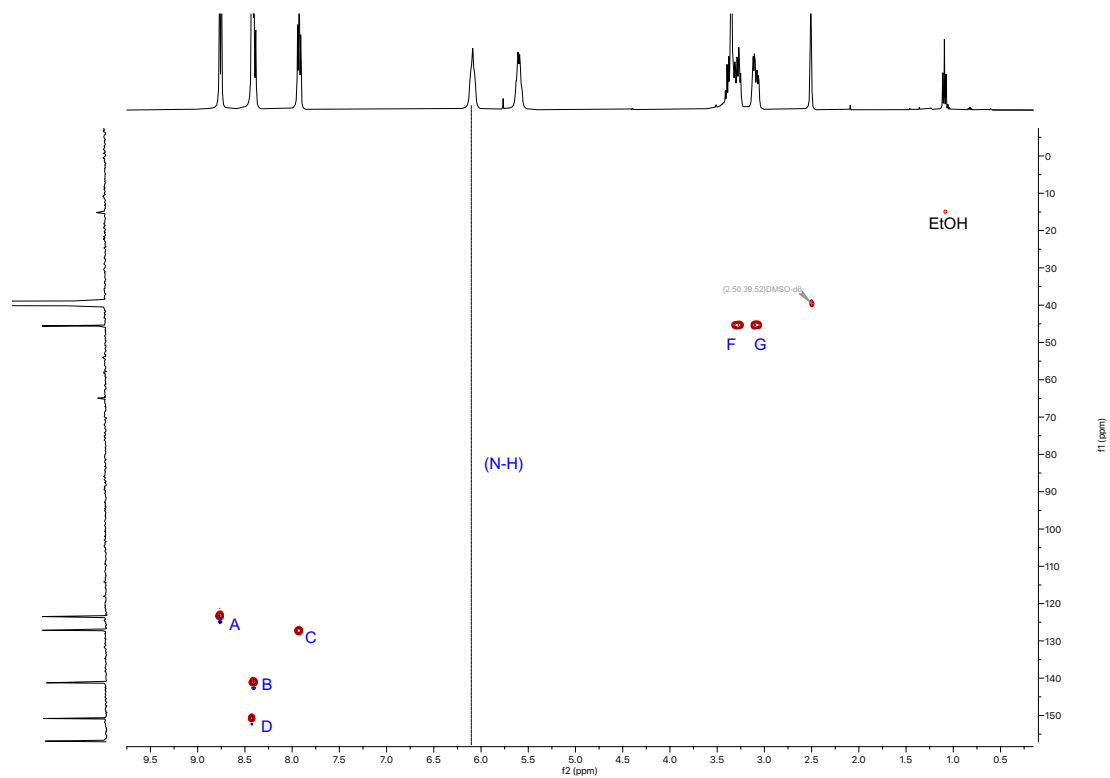

Figure S8. 2D HSQC NMR of **1a** (DMSO-*d*<sub>6</sub>, 298 K)

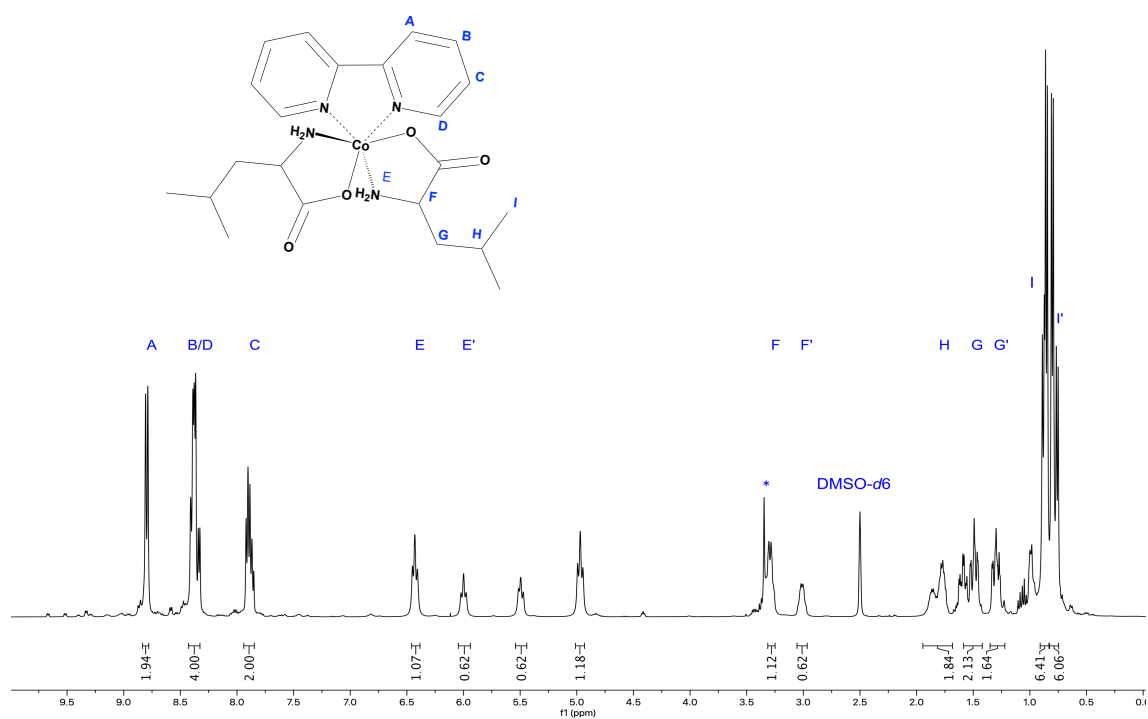

Figure S9. <sup>1</sup>H NMR of **2** (DMSO-*d*<sub>6</sub>, 298 K) (\*H<sub>2</sub>O)

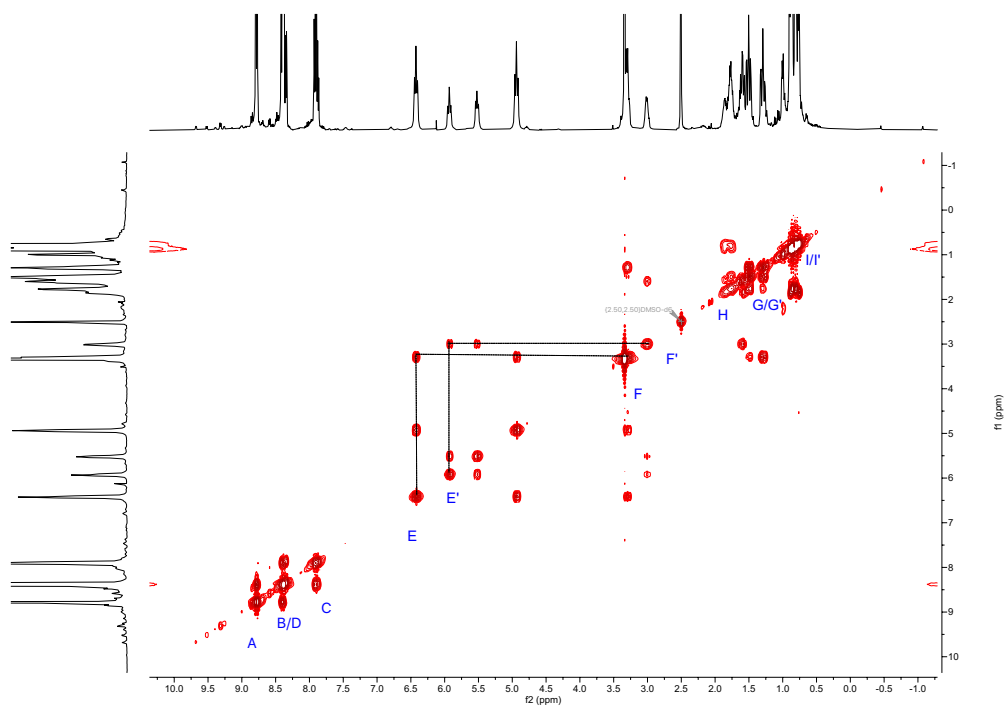

Figure S10. 2D COSY NMR of **2** (DMSO- $d_6$ , 298 K)

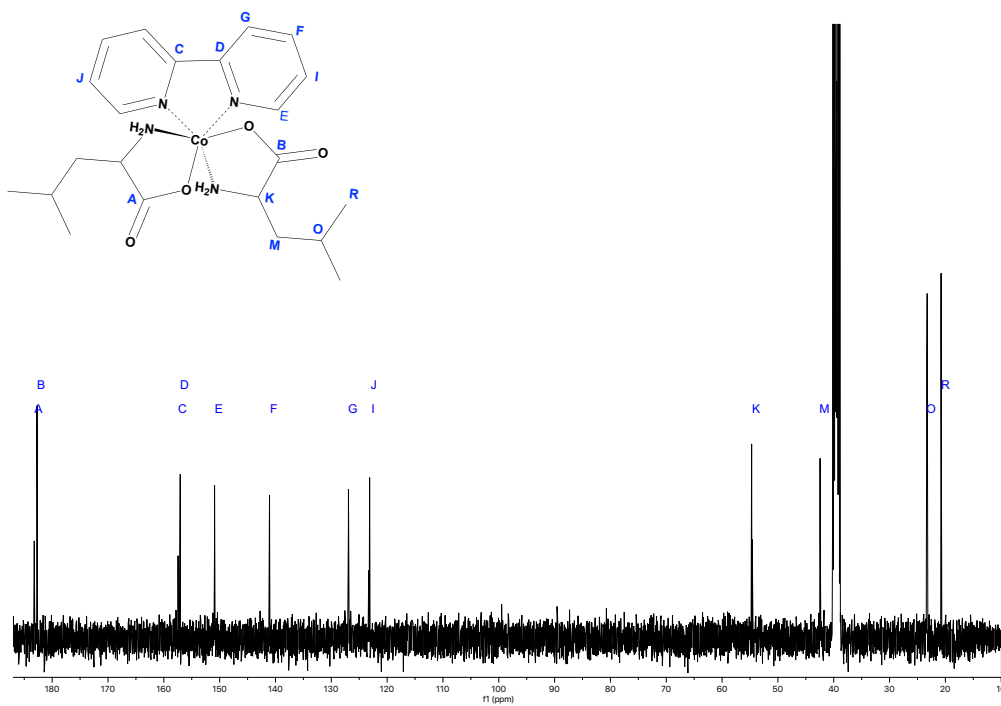

Figure S11.  $^{13}\text{C}$  NMR of **2** (DMSO- $d_6$ , 298 K)

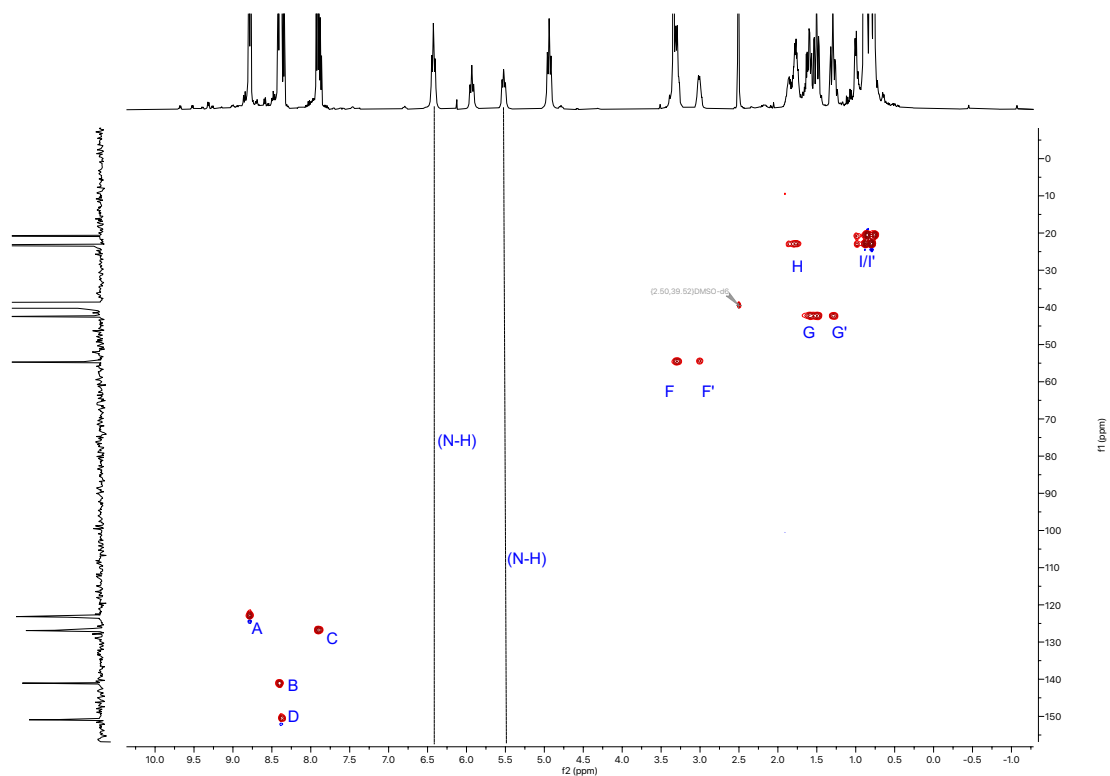

Figure S12. 2D HSQC NMR of **2** (DMSO- $d_6$ , 298 K)

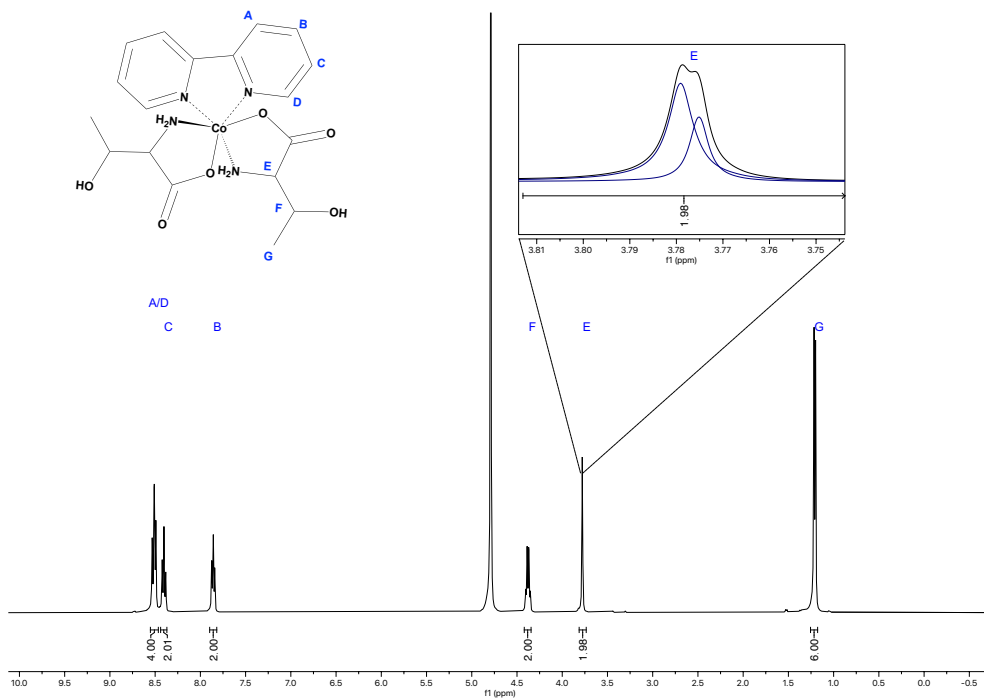

Figure S13.  $^1\text{H}$  NMR of **3** in ( $\text{D}_2\text{O}$ , 298 K)

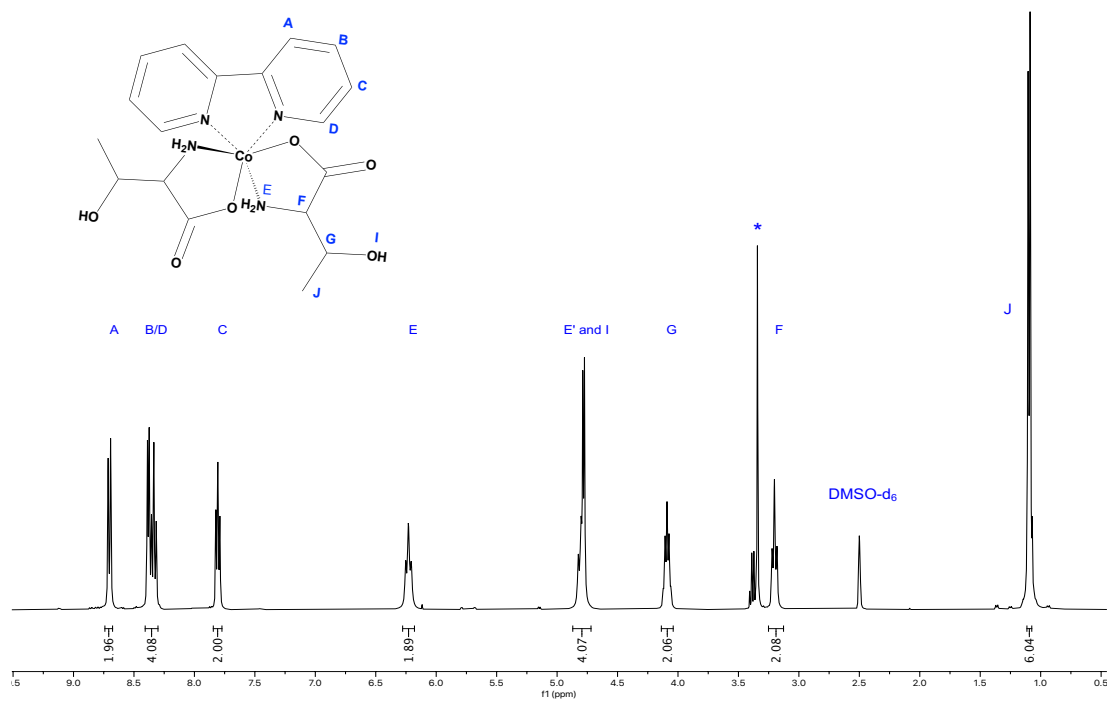

Figure S14.  $^1\text{H}$  NMR of **3** in ( $\text{DMSO-}d_6$ , 298 K)(\* $\text{EtOH}/\text{H}_2\text{O}$ )

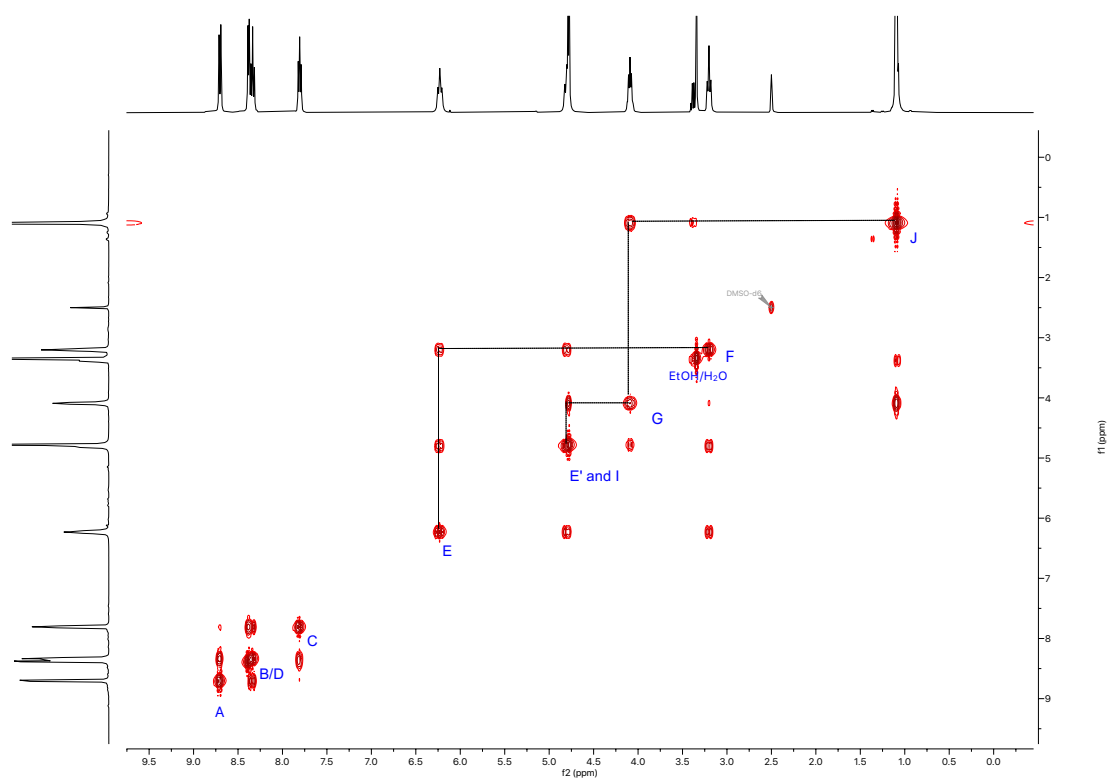

Figure S15. 2D COSY NMR of **3** ( $\text{DMSO-}d_6$ , 298 K)



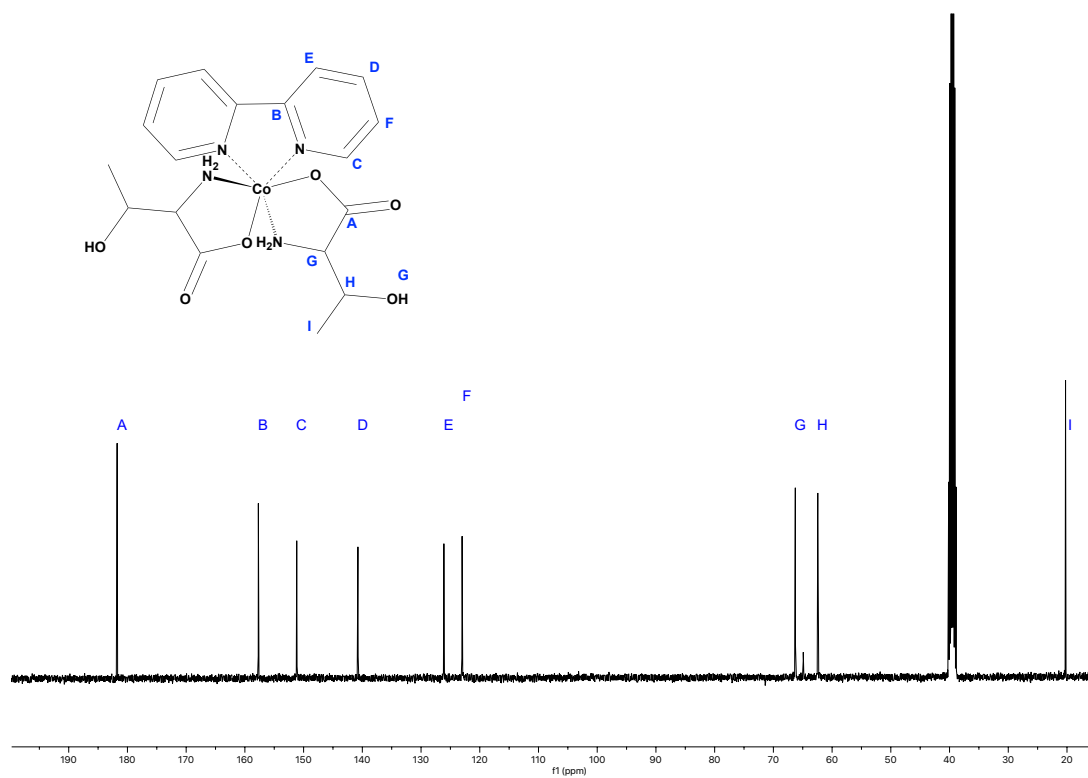

Figure S16.  $^{13}\text{C}$  NMR of **3** (DMSO- $d_6$ , 298 K)

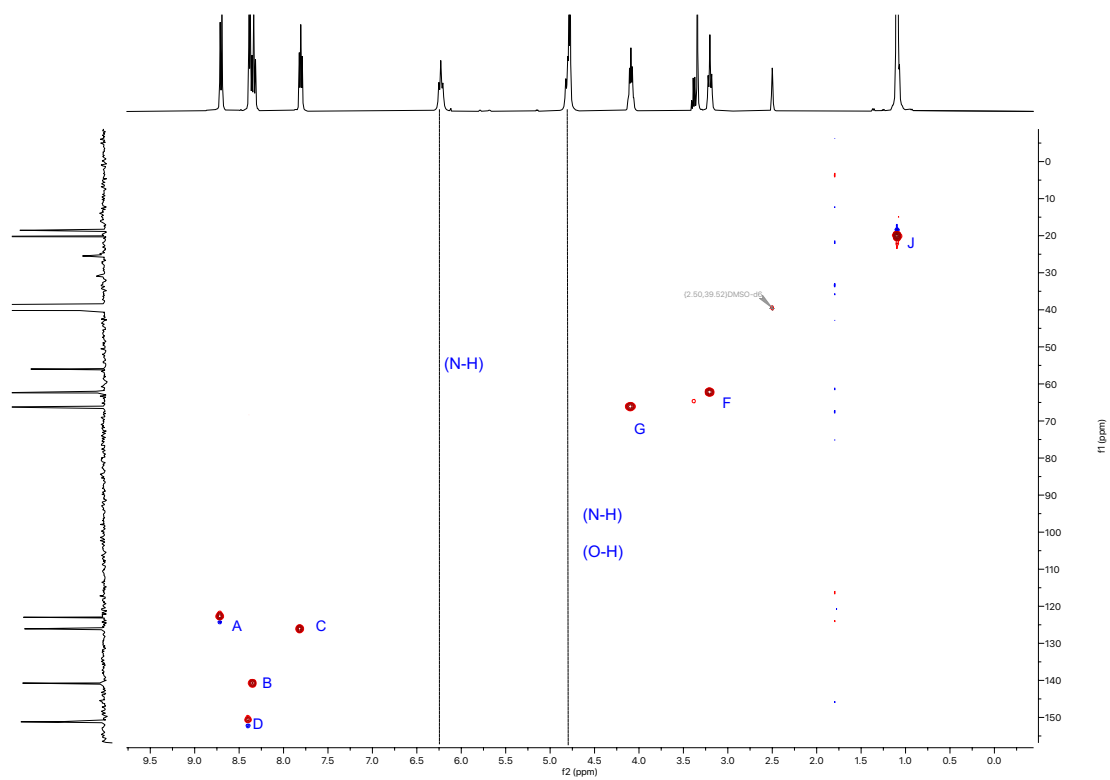

Figure S17. 2D HSQC NMR of **3** (DMSO- $d_6$ , 298 K)

## IR spectroscopy

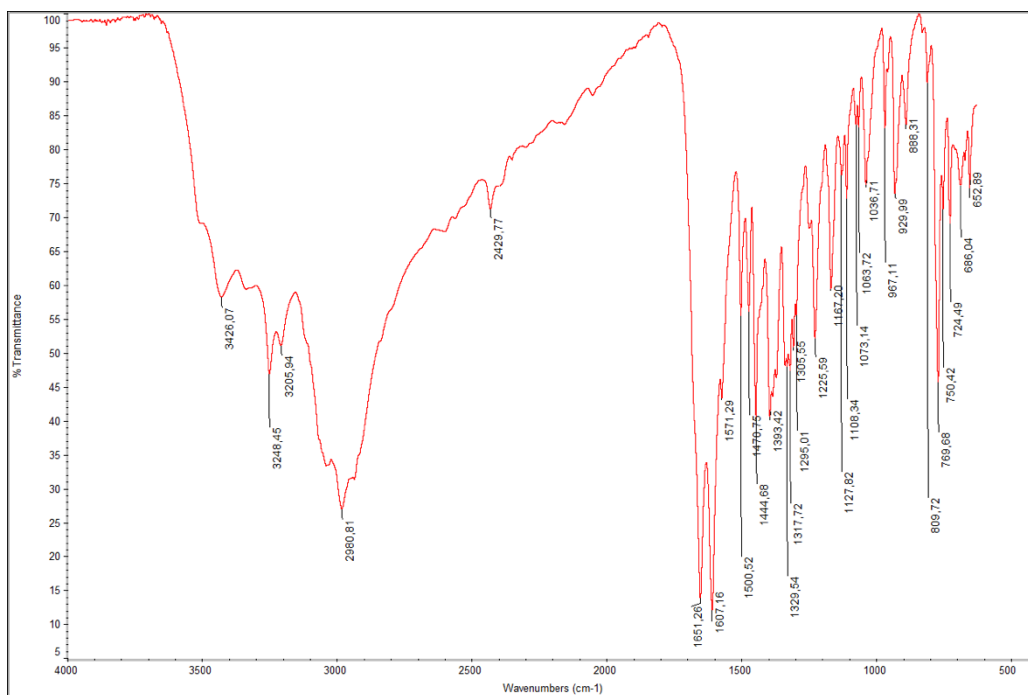

Figure S18. FT-IR spectra of 1

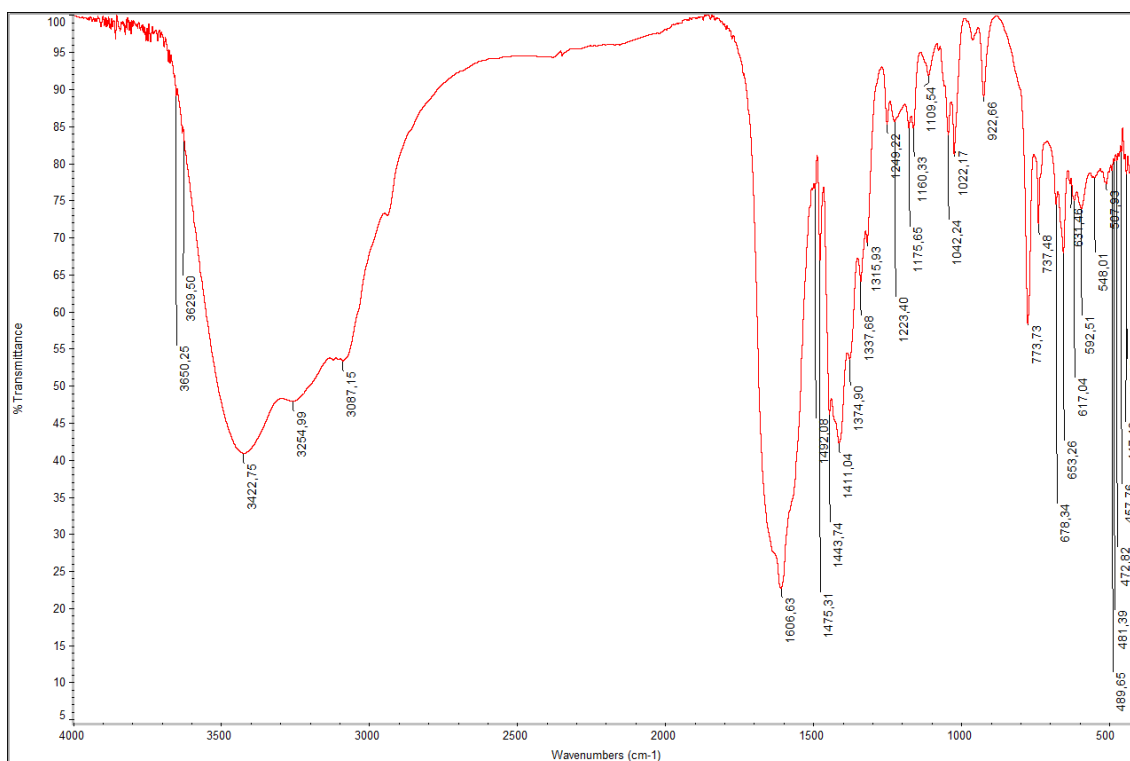

Figure S19. FT-IR of 4

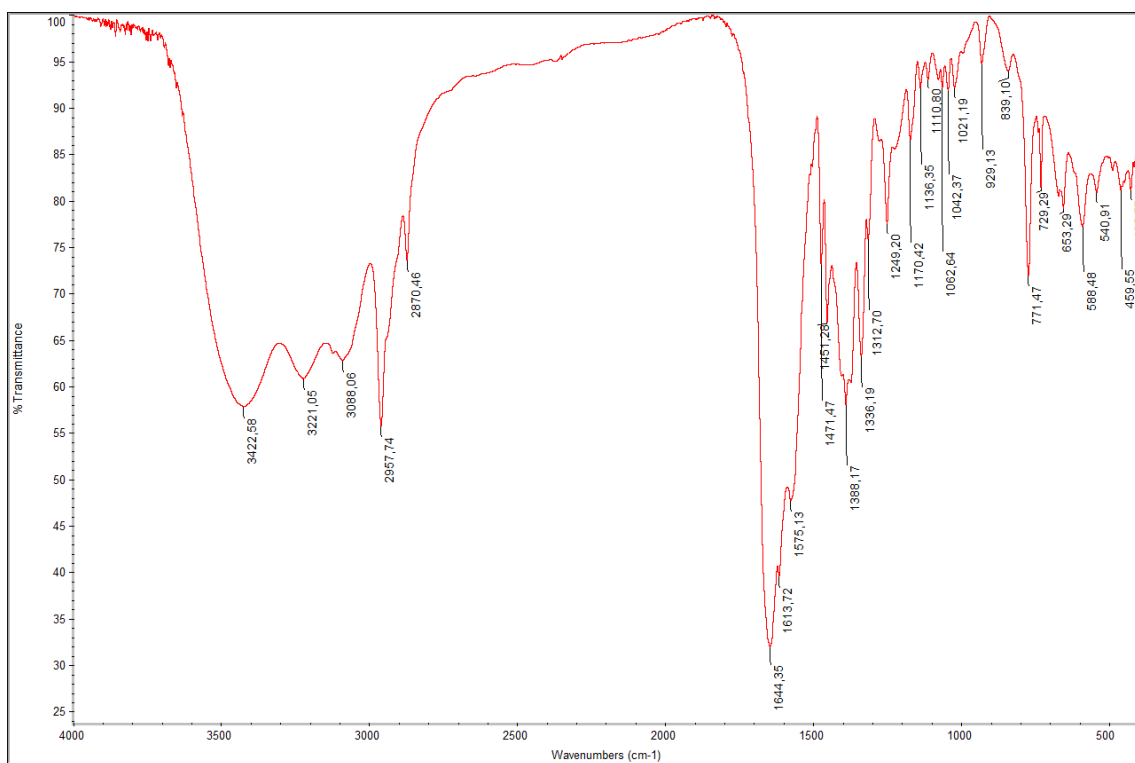

Figure S20. FT-IR of 5

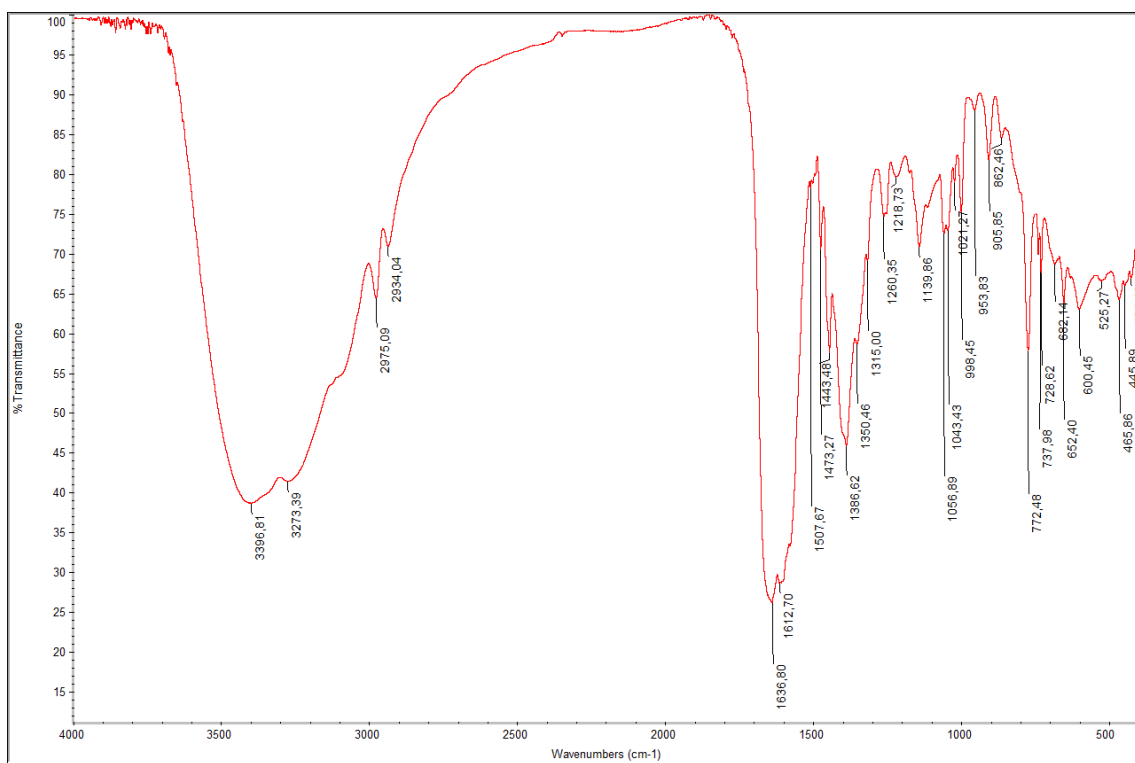

Figure S21. FT-IR of 6

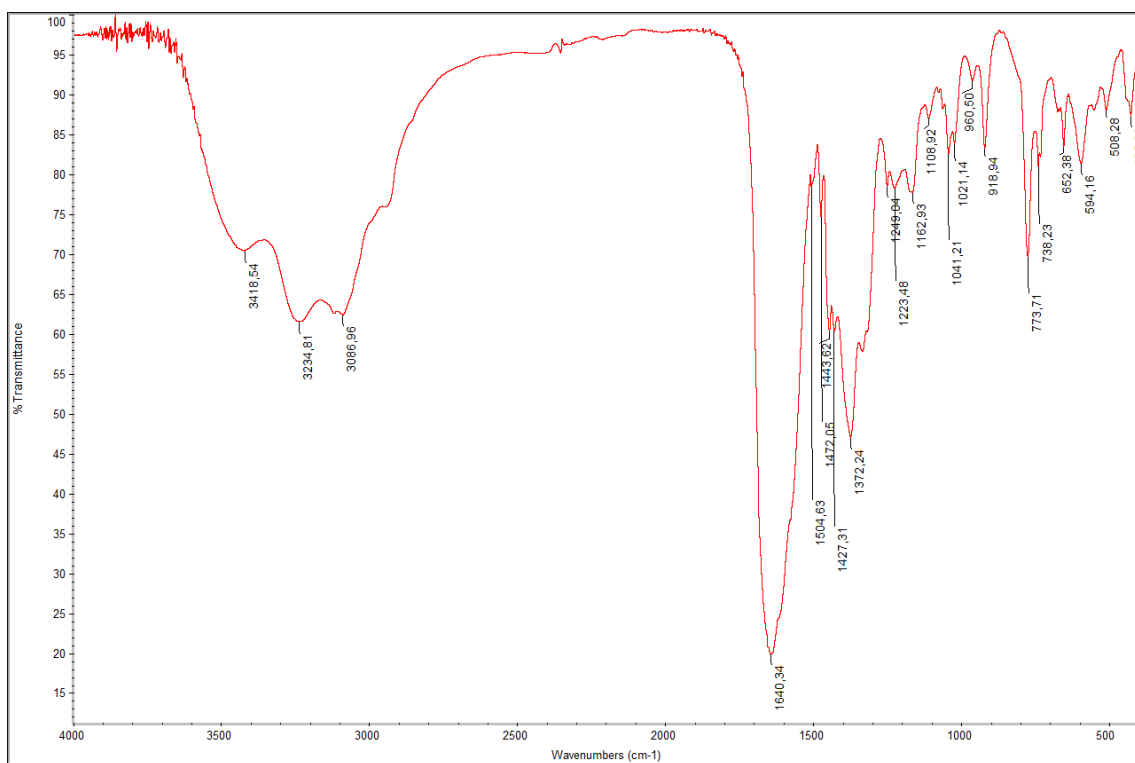

Figure S22. FT-IR spectra of **8**

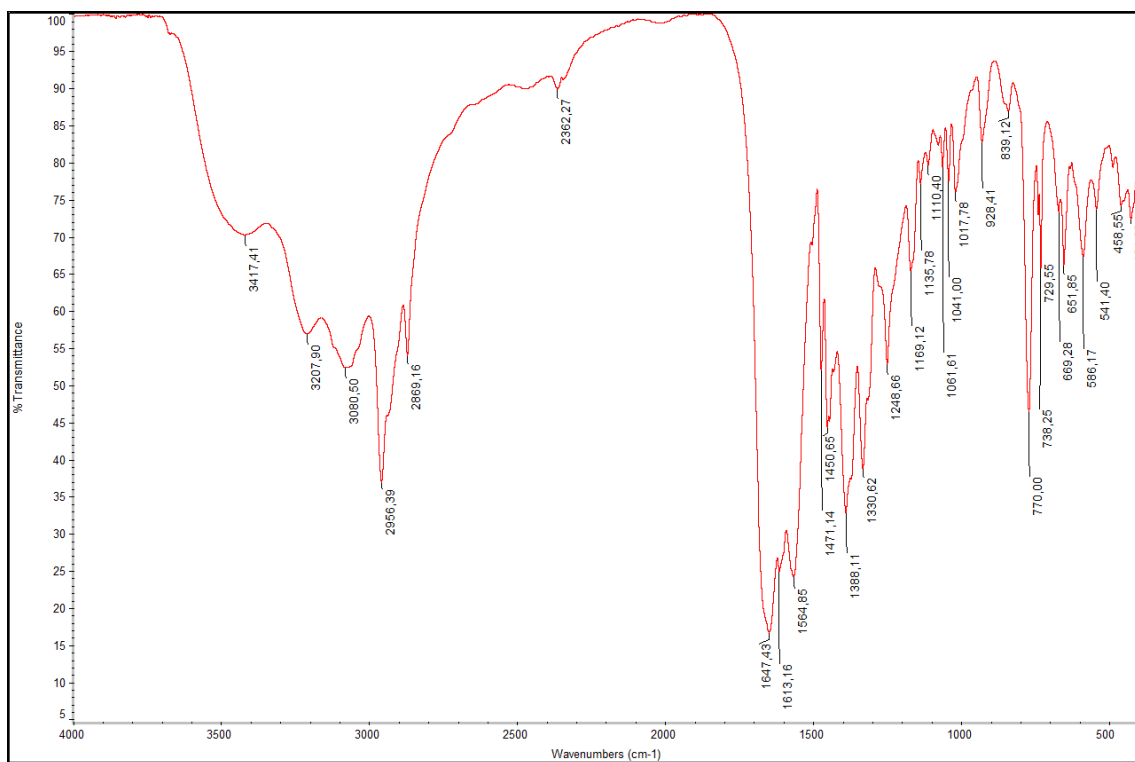

Figure S23. FT-IR spectra of **9**

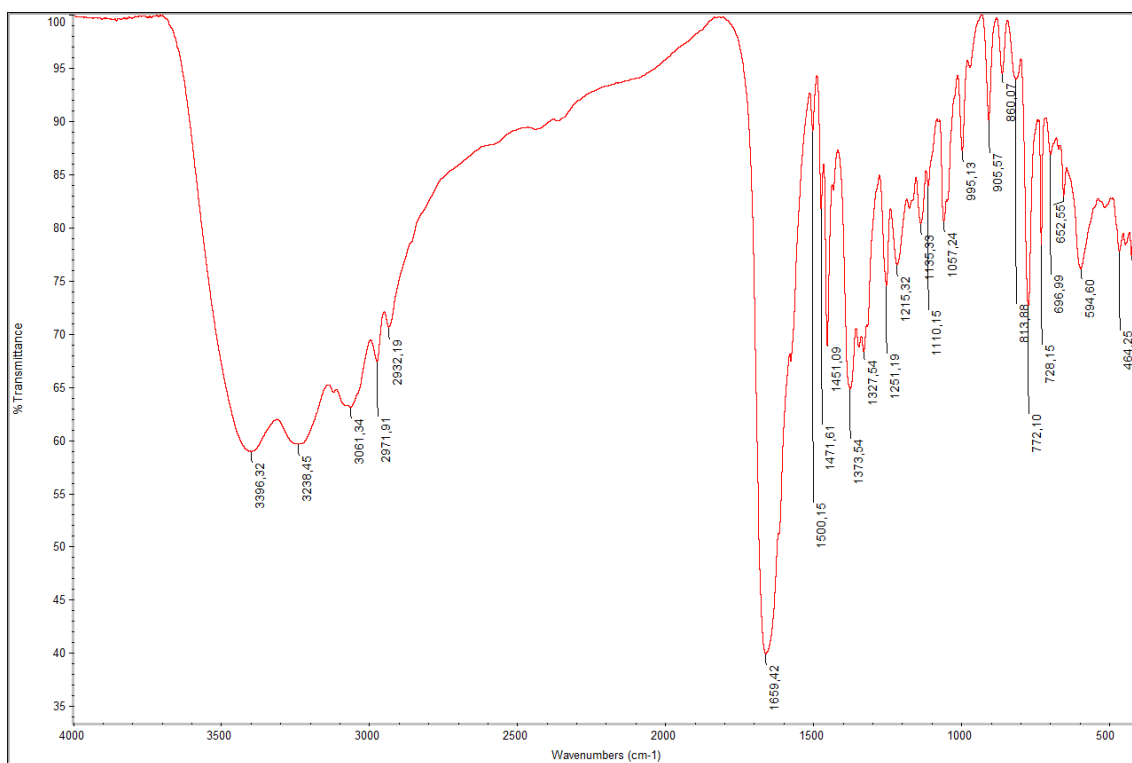

Figure S24. FT-IR spectra of **10**.

### High-resolution mass spectrometry (HRMS)

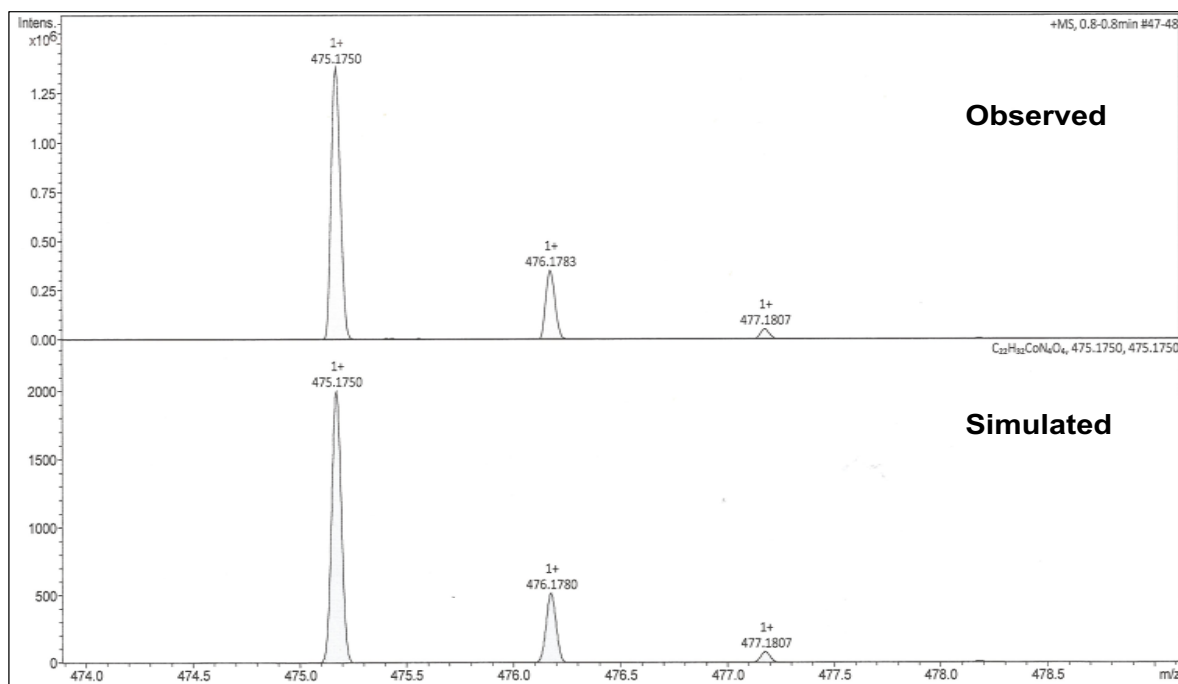

Figure S25. HRMS-ESI of **2**

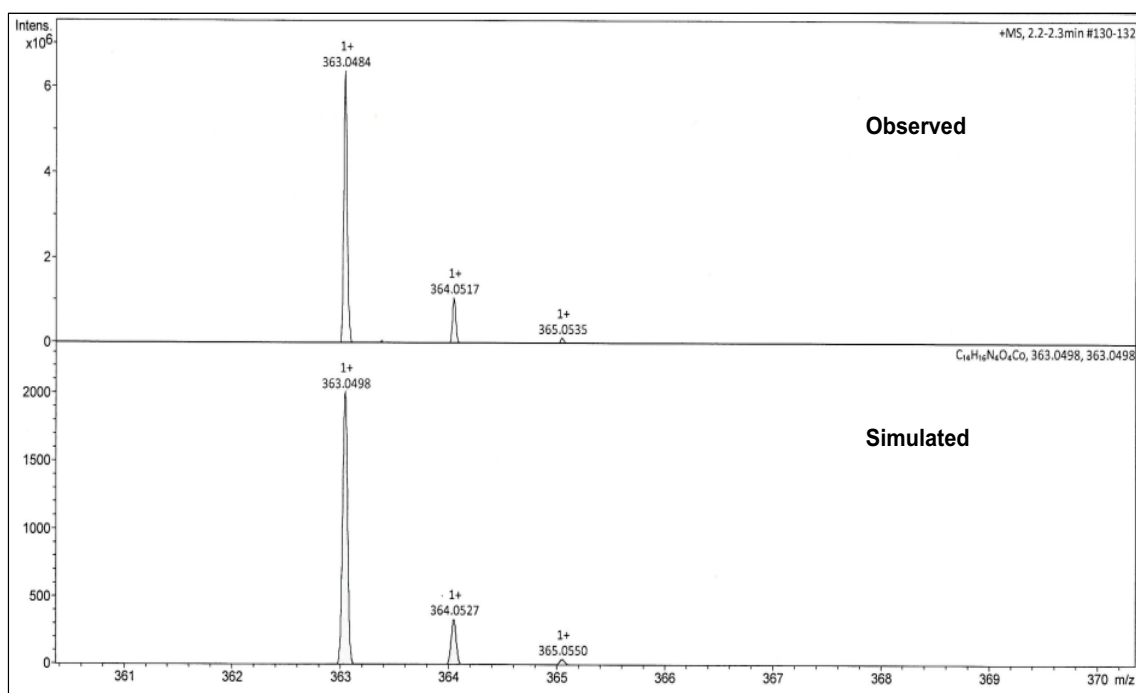

Figure S26. HRMS-ESI of **4a**

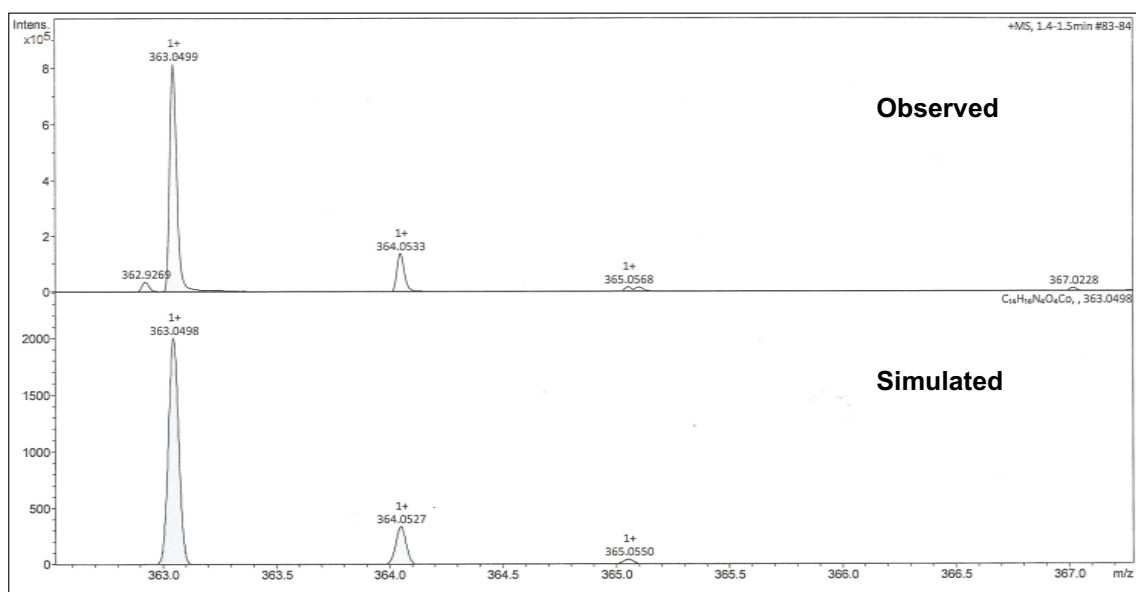

Figure S27. HRMS-ESI of **8**

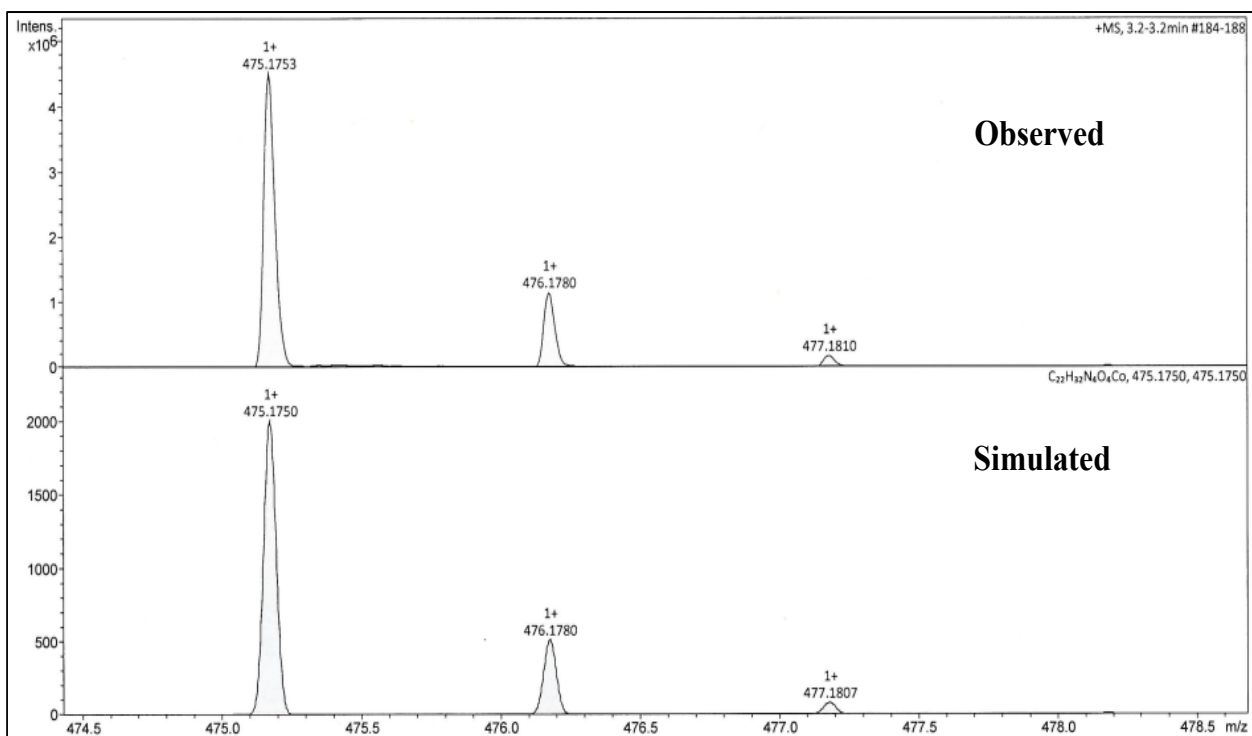

Figure S28. HRMS-ESI of **9**

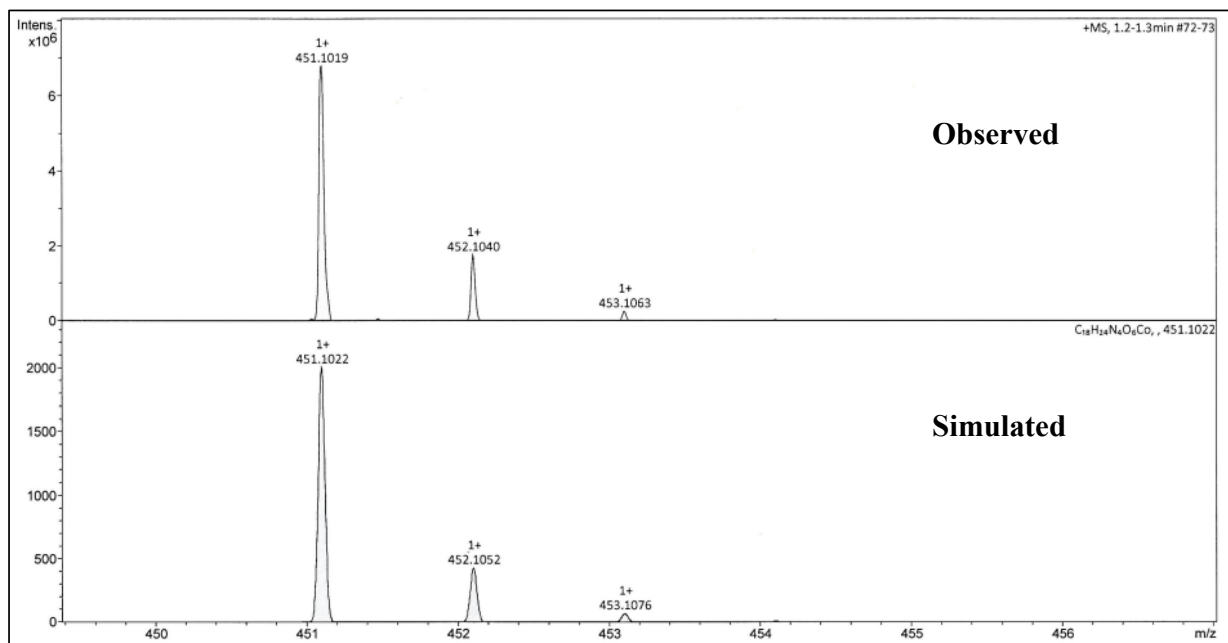

Figure S29. HRMS-ESI of **10**

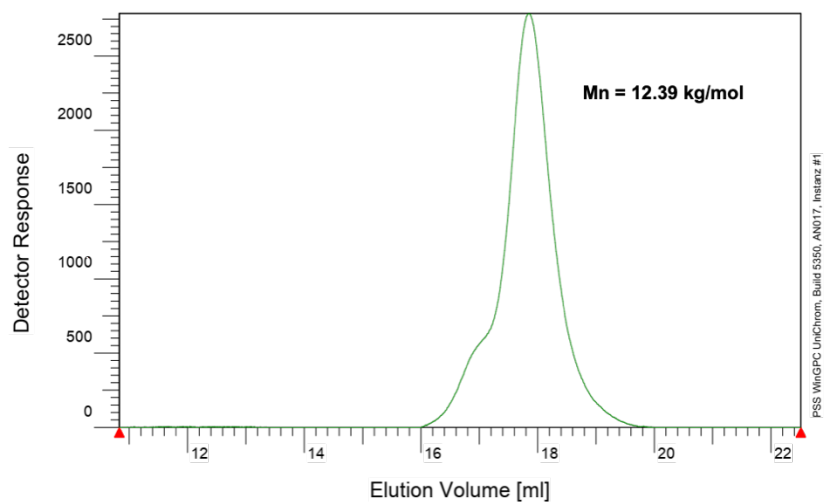

Figure S30. GPC chromatogram of PLA obtained by reaction of *rac*-lactide and **8** (entry 1) Table 2.

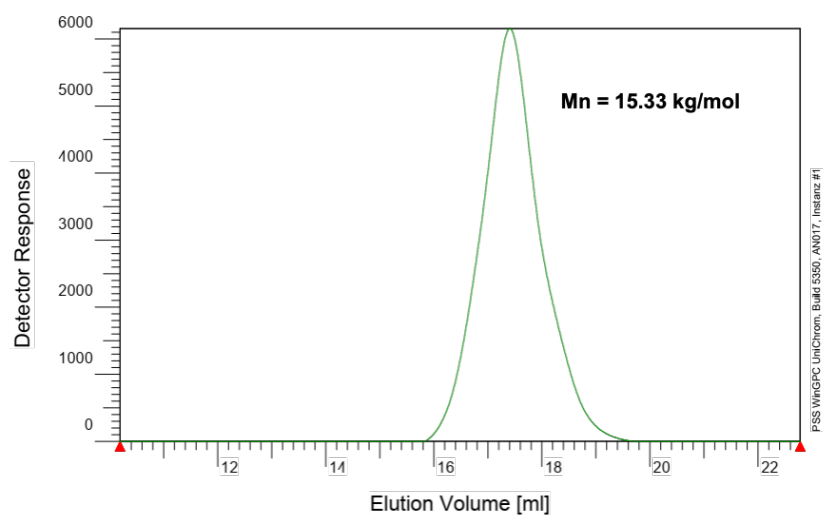

Figure S31. GPC chromatogram of PLA obtained by reaction of *rac*-lactide and **9** (entry 4) Table 2.



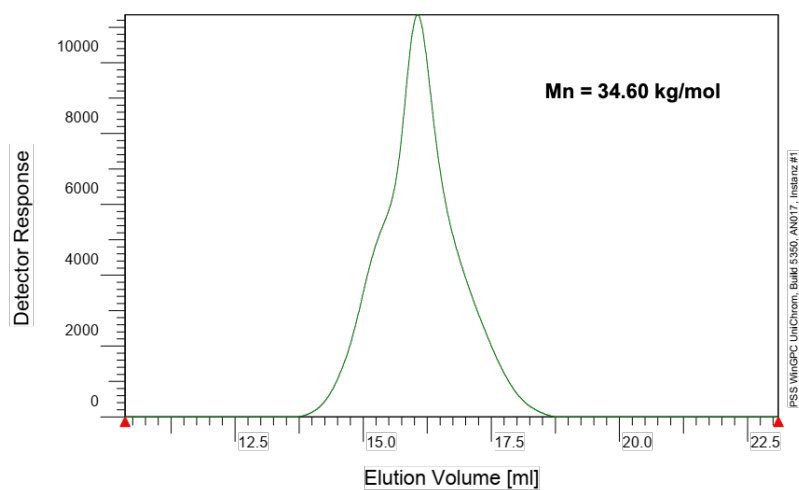

Figure S32. GPC chromatogram of PLA obtained by reaction of rac-lactide and **9** (entry 5) Table 2.

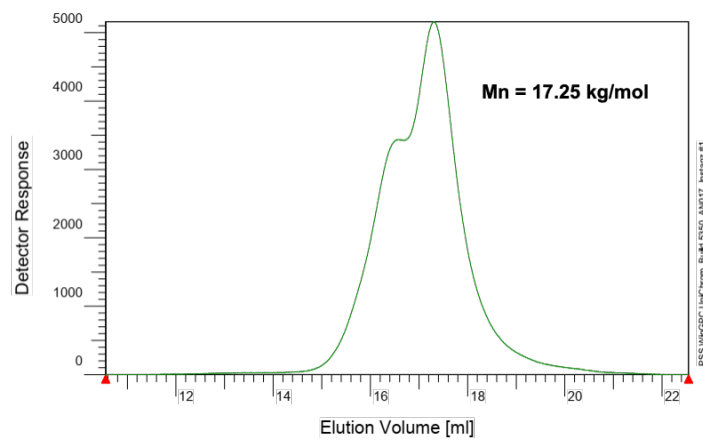

Figure S33. GPC chromatogram of PLA obtained by reaction of rac-lactide and **10** (entry 7) Table 2.

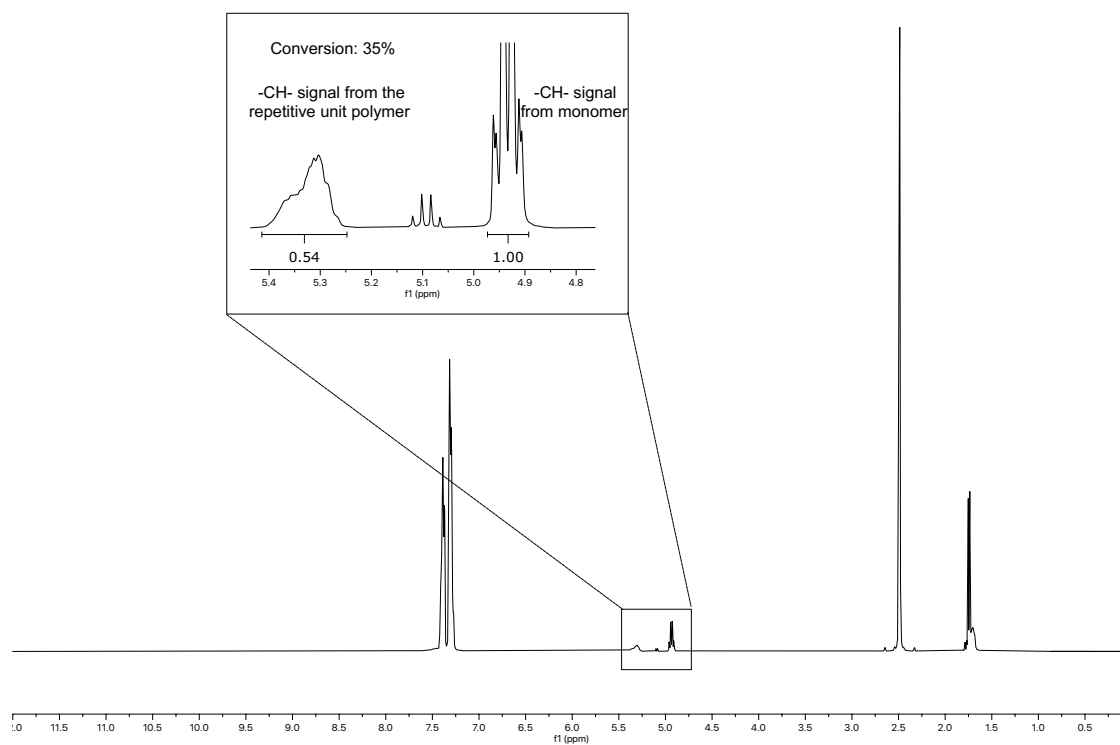

Figure S34. Representative  $^1\text{H}$  NMR spectrum of PLA in  $(\text{CDCl}_3)$  prepared by complex **8**.

$[\text{LA}]:[\mathbf{8}] = 100:1$ ,  $[\text{LA}] = 1 \text{ M}$ , Toluene, 403 K.

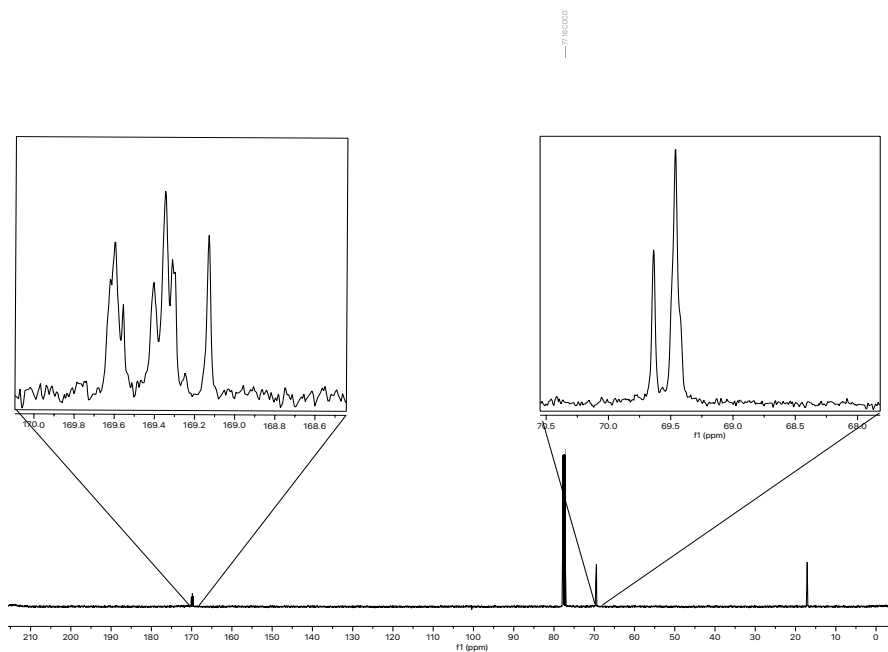

Figure S35. Carbonyl region (170-168 ppm) and methine region (70-67 ppm) of the  $^{13}\text{C}$  NMR spectra of PLA.

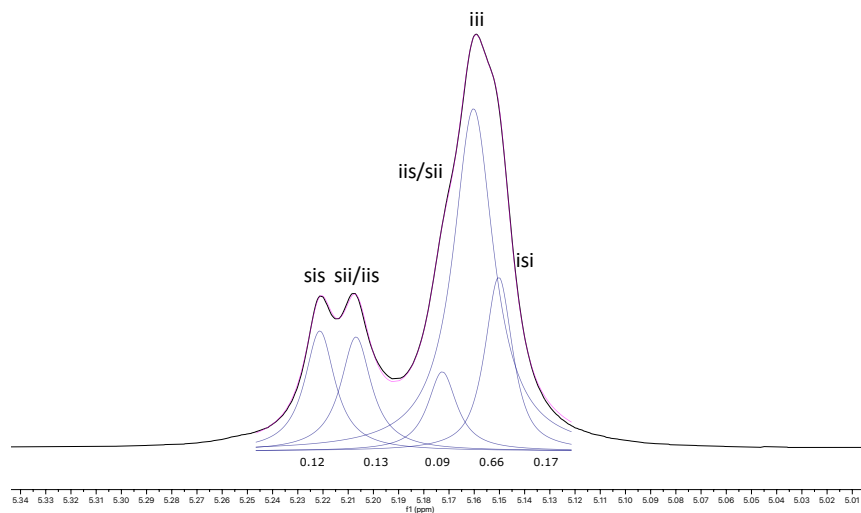

Figure S36. Representative homonuclear decoupled  $^1\text{H}\{^1\text{H}\}$  NMR spectrum of PLA in  $(\text{CDCl}_3)$  prepared by complex **8**.  $[\text{LA}]:[\mathbf{8}] = 100:1$ ,  $[\text{LA}] = 1 \text{ M}$ , Toluene, 403 K.

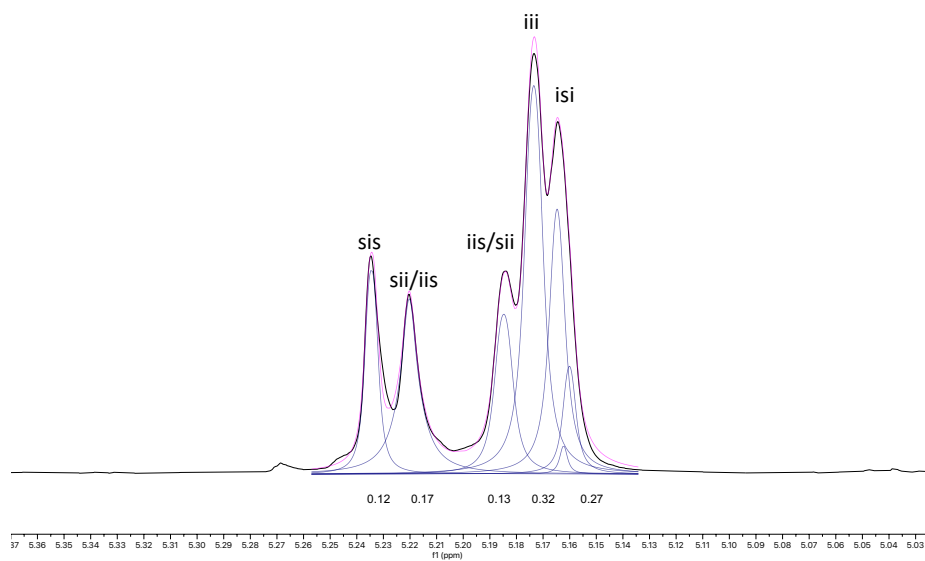

Figure S37. Representative homonuclear decoupled  $^1\text{H}\{^1\text{H}\}$  NMR spectrum of PLA in  $\text{CDCl}_3$  prepared by complex **9**.  $[\text{LA}]:[\mathbf{9}] = 100:1$ ,  $[\text{LA}] = 1 \text{ M}$ , Toluene, 403 K.

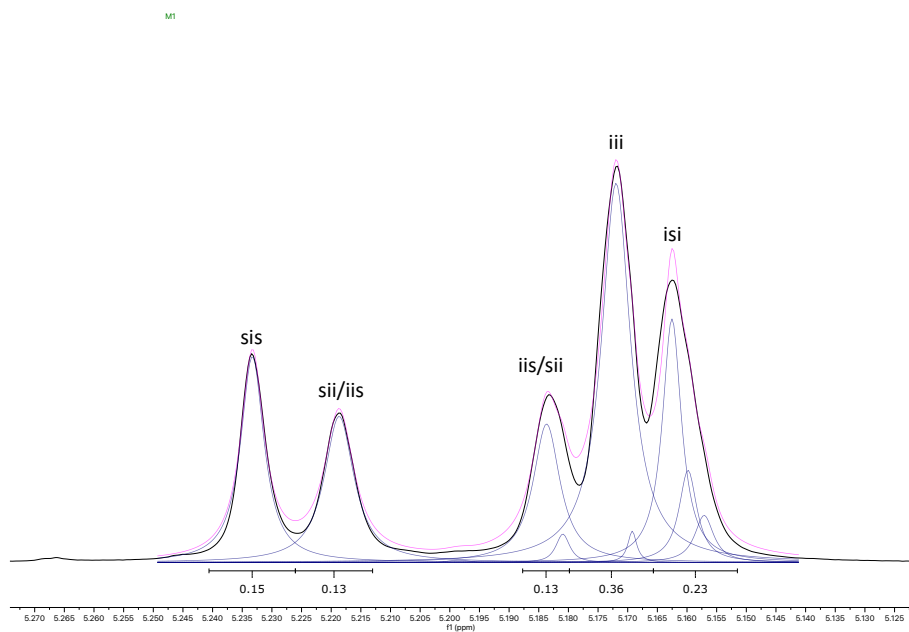

Figure S38. Representative homonuclear decoupled  $^1\text{H}\{^1\text{H}\}$  NMR spectrum of PLA in  $\text{CDCl}_3$  prepared by complex **10**.  $[\text{LA}]:[\mathbf{10}] = 100:1$ ,  $[\text{LA}] = 1 \text{ M}$ , Toluene, 403 K.

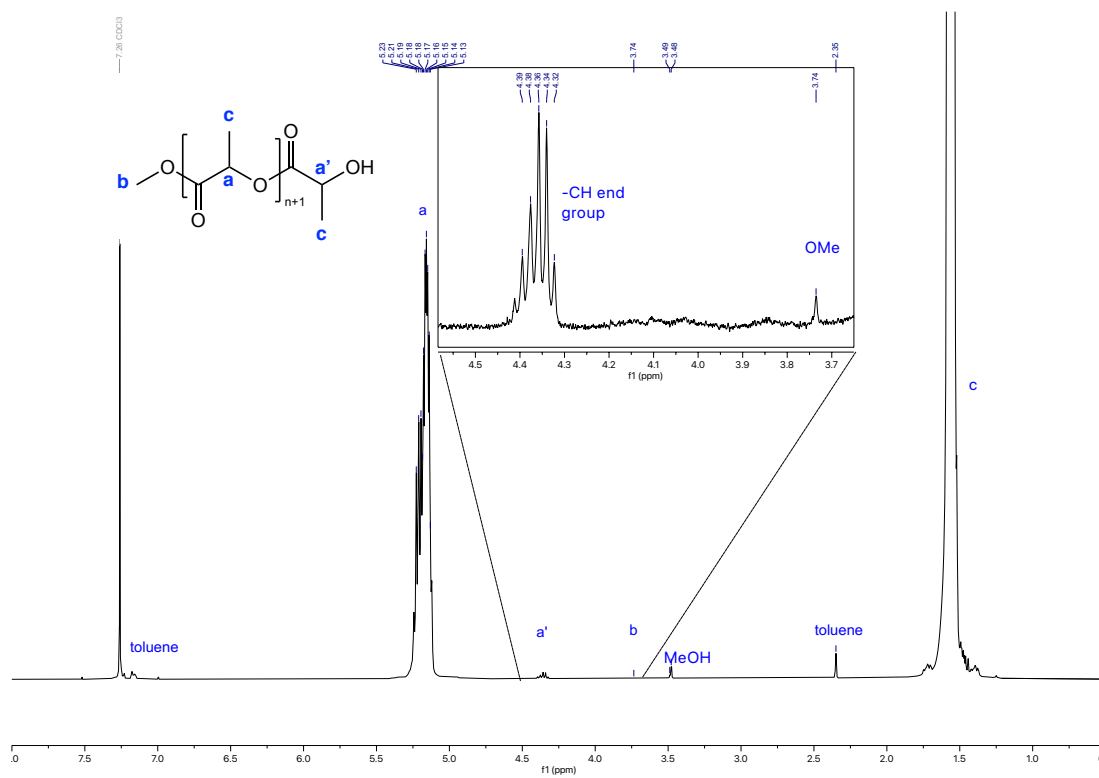

Figure S39. Representative  $^1\text{H}$  NMR spectrum of low molecular weight PLA (after precipitation with MeOH) in  $(\text{CDCl}_3)$  prepared by complex **8**.  $[\text{LA}]:[\mathbf{8}] = 20:1$ ,  $[\text{LA}] = 1 \text{ M}$ , Toluene, 403 K.
